# Supplementary material for: DNA barcoding evaluation and implications for phylogenetic relationships in Lauraceae from China
Source: PLoS One. 2017 Apr 17;12(4):e0175788. doi: 10.1371/journal.pone.0175788 (PMC5393608; doi:10.1371/journal.pone.0175788)
Supplement: S1 Table — (XLSX) [file pone.0175788.s001.xlsx]

## Sheet: S1
Family Latin name	Latin name	Collection No.	Country	State/Province	City/county	Locality	Latitude	Longitude	Elevation (m)	Collection Date	Collectors	Identifier	Identification date	Herbarium/Voucher number
Lauraceae	Lindera pulcherrima var.hemsleyana	CXQ0001	China	Guangxi	Nanning	Wuming Daming Mountain	N23°29'58.2"	E108°26'05.6"	1226	2010/05/12	Xiu-Qin Ci；Xiang-Qin Yu；Pei-Rui Sun	Hsi-Wen Li	2010-06-23	HITBC CXQ0001
Lauraceae	Litsea elongata	CXQ0002	China	Guangxi	Nanning	Wuming Daming Mountain	N23°29'58.3"	E108°26'05.7"	1228	2010/05/12	Xiu-Qin Ci；Xiang-Qin Yu；Pei-Rui Sun	Hsi-Wen Li	2010-06-23	HITBC CXQ0002
Lauraceae	Machilus kurzii	CXQ0005	China	Guangxi	Nanning	Wuming Daming Mountain	N23°29'58.4"	E108°26'05.8"	1228	2010/05/12	Xiu-Qin Ci；Xiang-Qin Yu；Pei-Rui Sun	Hsi-Wen Li	2010-06-23	HITBC CXQ0005
Lauraceae	Litsea rotundifolia var. oblongifolia	CXQ0008	China	Guangxi	Nanning	Wuming Daming Mountain	N23°29'58.5"	E108°26'05.9"	1229	2010/05/13	Xiu-Qin Ci；Xiang-Qin Yu；Pei-Rui Sun	Hsi-Wen Li	2010-06-23	HITBC CXQ0008
Lauraceae	Litsea rotundifolia var.oblongifolia	CXQ0009	China	Guangxi	Nanning	Wuming Daming Mountain	N23°29'58.6"	E108°26'05.10"	1230	2010/05/13	Xiu-Qin Ci；Xiang-Qin Yu；Pei-Rui Sun	Hsi-Wen Li	2010-06-23	HITBC CXQ0009
Lauraceae	Machilus decursinervis	CXQ0010	China	Guangxi	Nanning	Wuming Daming Mountain	N23°29'58.2"	E108°26'03.2"	1206	2010/05/13	Xiu-Qin Ci；Xiang-Qin Yu；Pei-Rui Sun	Hsi-Wen Li	2010-06-23	HITBC CXQ0010
Lauraceae	Cinnamomum subavenium	CXQ0017	China	Guangxi	Nanning	Wuming Daming Mountain	N23°30'10"	E108°25'58"	1235	2010/05/13	Xiu-Qin Ci；Xiang-Qin Yu；Pei-Rui Sun	Hsi-Wen Li	2011-04-11	HITBC CXQ0017
Lauraceae	Cinnamomum burmannii	CXQ0020	China	Guangxi	Nanning	Wuming Daming Mountain	N23°29'58.2"	E108°26'03.2"	1256	2010/05/13	Xiu-Qin Ci；Xiang-Qin Yu；Pei-Rui Sun	Hsi-Wen Li	2010-06-23	HITBC CXQ0020
Lauraceae	Machilus decursinervis	CXQ0023	China	Guangxi	Nanning	Wuming Daming Mountain	N23°29'58.2"	E108°26'03.2"	1247	2010/05/13	Xiu-Qin Ci；Xiang-Qin Yu；Pei-Rui Sun	Hsi-Wen Li	2010-06-23	HITBC CXQ0023
Lauraceae	Machilus kurzii	CXQ0024	China	Guangxi	Nanning	Wuming Daming Mountain	N23°29'58.2"	E108°26'03.2"	1260	2010/05/14	Xiu-Qin Ci；Xiang-Qin Yu；Pei-Rui Sun	Hsi-Wen Li	2010-06-23	HITBC CXQ0024
Lauraceae	Neolitsea zeylanica	CXQ0025	China	Guangxi	Nanning	Wuming Daming Mountain	N23°29'58.2"	E108°26'03.2"	1260	2010/05/13	Xiu-Qin Ci；Xiang-Qin Yu；Pei-Rui Sun	Hsi-Wen Li	2010-06-23	HITBC CXQ0025
Lauraceae	Litsea rotundifolia var.oblongifolia	CXQ0026	China	Guangxi	Nanning	Wuming Daming Mountain	N23°29'58.2"	E108°26'03.2"	1260	2010/05/14	Xiu-Qin Ci；Xiang-Qin Yu；Pei-Rui Sun	Hsi-Wen Li	2010-06-23	HITBC CXQ0026
Lauraceae	Machilus decursinervis	CXQ0039	China	Guangxi	Nanning	Wuming Daming Mountain	N23°29'58.2"	E108°26'03.2"	1263	2010/05/13	Xiu-Qin Ci；Xiang-Qin Yu；Pei-Rui Sun	Hsi-Wen Li	2010-06-23	HITBC CXQ0039
Lauraceae	Cinnamomum pauciflorum	CXQ0040	China	Guangxi	Nanning	Guangxi Medicinal Botanical Garden	N22°51′	E108°19′	98	2010/05/15	Xiu-Qin Ci；Xiang-Qin Yu；Pei-Rui Sun	Hsi-Wen Li	2010-06-23	HITBC CXQ0040
Lauraceae	Litsea rotundifolia	CXQ0047	China	Guangxi	Nanning	Guangxi Medicinal Botanical Garden	N22°52′	E108°20′	98	2010/05/15	Xiu-Qin Ci；Xiang-Qin Yu；Pei-Rui Sun	Hsi-Wen Li	2010-06-23	HITBC CXQ0047
Lauraceae	Litsea glutinosa var.brideliifolia	CXQ0051	China	Guangxi	Nanning	Guangxi Medicinal Botanical Garden	N22°52′	E108°20′	98	2010/05/15	Xiu-Qin Ci；Xiang-Qin Yu；Pei-Rui Sun	Hsi-Wen Li	2010-06-23	HITBC CXQ0051
Lauraceae	Litsea glutinosa var.brideliifolia	CXQ0053	China	Guangxi	Fangchenggang	Shangsi County	N22°09′42.10″	E107°59′24.14"	1576	2010/05/16	Xiu-Qin Ci；Xiang-Qin Yu；Pei-Rui Sun	Hsi-Wen Li	2010-06-23	HITBC CXQ0053
Lauraceae	Machilus velutina	CXQ0055	China	Guangxi	Fangchenggang	Shangsi Shiwandashan Moshi Valley	N21°54′44.54″	E107°54′55.73″	320	2010/05/17	Xiu-Qin Ci；Xiang-Qin Yu；Pei-Rui Sun	Hsi-Wen Li	2010-06-23	HITBC CXQ0055
Lauraceae	Actinodaphne pilosa	CXQ0056	China	Guangxi	Fangchenggang	Shangsi Shiwandashan Moshi Valley	N21°54′44.54″	E107°54′55.73″	335	2010/05/17	Xiu-Qin Ci；Xiang-Qin Yu；Pei-Rui Sun	Hsi-Wen Li	2010-06-23	HITBC CXQ0056
Lauraceae	Iteadaphne caudata	CXQ0057	China	Guangxi	Fangchenggang	Shangsi Shiwandashan Moshi Valley	N21°54′44.54″	E107°54′55.73″	350	2010/05/17	Xiu-Qin Ci；Xiang-Qin Yu；Pei-Rui Sun	Hsi-Wen Li	2010-06-23	HITBC CXQ0057
Lauraceae	Actinodaphne pilosa	CXQ0060	China	Guangxi	Fangchenggang	Shangsi Shiwandashan Moshi Valley	N21°54′44.54″	E107°54′55.73″	349	2010/05/17	Xiu-Qin Ci；Xiang-Qin Yu；Pei-Rui Sun	Hsi-Wen Li	2010-06-23	HITBC CXQ0060
Lauraceae	Cinnamomum parthenoxylon	CXQ0063	China	Guangxi	Fangchenggang	Shangsi Shiwandashan Moshi Valley	N21°54′44.54″	E107°54′55.73″	359	2010/05/17	Xiu-Qin Ci；Xiang-Qin Yu；Pei-Rui Sun	Hsi-Wen Li	2010-06-23	HITBC CXQ0063
Lauraceae	Cryptocarya calcicola	CXQ0069	China	Guangxi	Fangchenggang	Shangsi Shiwandashan Moshi Valley	N21°54′44.54″	E107°54′55.73″	382	2010/05/17	Xiu-Qin Ci；Xiang-Qin Yu；Pei-Rui Sun	Hsi-Wen Li	2010-06-23	HITBC CXQ0069
Lauraceae	Neolitsea zeylanica	CXQ0072	China	Guangxi	Fangchenggang	Shangsi Shiwandashan Moshi Valley	N21°54′44.54″	E107°54′55.73″	326	2010/05/17	Xiu-Qin Ci；Xiang-Qin Yu；Pei-Rui Sun	Hsi-Wen Li	2010-06-23	HITBC CXQ0072
Lauraceae	Litsea kingii	CXQ0075	China	Guangxi	Fangchenggang	Shangsi Shiwandashan Moshi Valley	N21°54′44.54″	E107°54′55.73″	288	2010/05/17	Xiu-Qin Ci；Xiang-Qin Yu；Pei-Rui Sun	Hsi-Wen Li	2010-06-23	HITBC CXQ0075
Lauraceae	Cinnamomum iners	CXQ0077	China	Guangxi	Fangchenggang	Shangsi Shiwandashan Moshi Valley	N21°57'31"	E108°02'36"	275	2010/05/18	Xiu-Qin Ci；Xiang-Qin Yu；Pei-Rui Sun	Hsi-Wen Li	2011-04-11	HITBC CXQ0077
Lauraceae	Litsea greenmaniana var. angustifolia	CXQ0080	China	Yunnan	Nanning	Wuming Daming Mountain	N23°31′35.67″	E108°20′27.05″	275	2010/05/17	Yong-Mei Xia	Hsi-Wen Li	2010-06-23	HITBC CXQ0080
Lauraceae	Litsea salicifolia	CXQ0103	China	Yunnan	Dehong	Yingjiang Nabang Mountain	N24°45′23.99″	E97°34′8.32″	320	2010/05/18	Xiu-Qin Ci；Lang Li；Jin-Shun Zhong	Hsi-Wen Li	2010-06-23	HITBC CXQ0103
Lauraceae	Phoebe puwenensis	CXQ0104	China	Yunnan	Dehong	Yingjiang Nabang Mountain	N24°45′23.99″	E97°34′8.32″	325	2010/05/18	Xiu-Qin Ci；Lang Li；Jin-Shun Zhong	Hsi-Wen Li	2010-06-23	HITBC CXQ0104
Lauraceae	Cinnamomum bejolghota	CXQ0105	China	Yunnan	Dehong	Yingjiang Nabang Mountain	N24°45'24"	E97°34'9"	921	2010/05/29	Xiu-Qin Ci；Lang Li；Jin-Shun Zhong	Hsi-Wen Li	2011-04-12	HITBC CXQ0105
Lauraceae	Machilus kurzii	CXQ0107	China	Yunnan	Dehong	Yingjiang Nabang Mountain	N24°45'23"	E97°34'8"	330	2010/05/19	Xiu-Qin Ci；Lang Li；Jin-Shun Zhong	Hsi-Wen Li	2010-06-23	HITBC CXQ0107
Lauraceae	Phoebe puwenensis	CXQ0109	China	Yunnan	Dehong	Yingjiang Nabang Mountain	N24°45'22"	E97°34'8"	901	2010/05/19	Xiu-Qin Ci；Lang Li；Jin-Shun Zhong	Hsi-Wen Li	2010-06-23	HITBC CXQ0109
Lauraceae	Litsea salicifolia	CXQ0110	China	Yunnan	Dehong	Yingjiang Nabang Mountain	N24°45'21"	E97°34'8"	901	2010/05/19	Xiu-Qin Ci；Lang Li；Jin-Shun Zhong	Hsi-Wen Li	2010-06-23	HITBC CXQ0110
Lauraceae	Lindera metcalfiana	CXQ0111	China	Hunan	Dehong	Yingjiang Nabang Mountain	N24°45'20"	E97°34'8"	920	2010/05/19	Xiu-Qin Ci；Lang Li；Jin-Shun Zhong	Hsi-Wen Li	2010-06-23	HITBC CXQ0111
Lauraceae	Cinnamomum pauciflorum	CXQ0202	China	Hunan	Shaoyang	Xinning Fanshuijiang Power station	N26°23′8.72″	E111°01′21.96″	940	2010/08/31	Xiu-Qin Ci；Xiang-Qin Yu；Pei-Rui Sun	Hsi-Wen Li	2010-09-16	HITBC CXQ0202
Lauraceae	Cinnamomum appelianum	CXQ0203	China	Hunan	Shaoyang	Xinning Fanshuijiang Power station	N26°23′8.72″	E111°01′21.96″	888	2010/08/31	Xiu-Qin Ci；Xiang-Qin Yu；Pei-Rui Sun	Hsi-Wen Li	2010-09-16	HITBC CXQ0203
Lauraceae	Cinnamomum appelianum	CXQ0204	China	Hunan	Shaoyang	Xinning Fanshuijiang Power station	N26°23′8.72″	E111°01′21.96″	902	2010/08/31	Xiu-Qin Ci；Xiang-Qin Yu；Pei-Rui Sun	Hsi-Wen Li	2010-09-16	HITBC CXQ0204
Lauraceae	Cinnamomum wilsonii	CXQ0206	China	Hunan	Shaoyang	Xinning Fanshuijiang Power station	N26°23′8.72″	E111°01′21.96″	966	2010/08/31	Xiu-Qin Ci；Xiang-Qin Yu；Pei-Rui Sun	Hsi-Wen Li	2010-09-16	HITBC CXQ0206
Lauraceae	Phoebe neurantha	CXQ0208	China	Hunan	Shaoyang	Xinning Fanshuijiang Power station	N26°23′8.72″	E111°01′21.96″	978	2010/08/31	Xiu-Qin Ci；Xiang-Qin Yu；Pei-Rui Sun	Hsi-Wen Li	2010-09-16	HITBC CXQ0208
Lauraceae	Phoebe sheareri	CXQ0213	China	Hunan	Shaoyang	Xinning Fanshuijiang Power station	N26°23′8.72″	E111°01′21.96″	1021	2010/08/31	Xiu-Qin Ci；Xiang-Qin Yu；Pei-Rui Sun	Hsi-Wen Li	2010-09-16	HITBC CXQ0213
Lauraceae	Lindera communis	CXQ0215	China	Hunan	Shaoyang	Xinning Fanshuijiang Power station	N26°23′8.72″	E111°01′21.96″	1105	2010/08/31	Xiu-Qin Ci；Xiang-Qin Yu；Pei-Rui Sun	Hsi-Wen Li	2010-09-16	HITBC CXQ0215
Lauraceae	Lindera reflexa	CXQ0222	China	Hunan	Shaoyang	Xinning Zihuaping Sibaibu	N38°39′6.48″	E104°04′35.11"	1119	2010/08/31	Xiu-Qin Ci；Xiang-Qin Yu；Pei-Rui Sun	Hsi-Wen Li	2010-09-16	HITBC CXQ0222
Lauraceae	Cinnamomum camphora	CXQ0224	China	Hunan	Shaoyang	Xinning Zihuaping Sibaibu	N26°23'16.7"	E111°00'55.5"	1122	2010/08/31	Xiu-Qin Ci；Xiang-Qin Yu；Pei-Rui Sun	Hsi-Wen Li	2010-09-16	HITBC CXQ0224
Lauraceae	Litsea mollis	CXQ0227	China	Hunan	Shaoyang	Xinning Zihuaping Sibaibu	N38°39′6.48″	E104°04′35.11"	1122	2010/08/31	Xiu-Qin Ci；Xiang-Qin Yu；Pei-Rui Sun	Hsi-Wen Li	2010-09-16	HITBC CXQ0227
Lauraceae	Litsea mollis	CXQ0234	China	Hunan	Shaoyang	Xinning Shunhuang Mountain	N26°21′56.77″	E111°0′54.54″	1122	2010/08/31	Xiu-Qin Ci；Xiang-Qin Yu；Pei-Rui Sun	Hsi-Wen Li	2010-09-16	HITBC CXQ0234
Lauraceae	Litsea cubeba	CXQ0247	China	Hunan	Yichang	From Mangshan hospital to Lin Guan Jv	N24°59′15.41″	E112°51′30.82"	1122	2010/09/03	Xiu-Qin Ci；Xiang-Qin Yu；Pei-Rui Sun	Hsi-Wen Li	2010-09-16	HITBC CXQ0247
Lauraceae	Cinnamomum glanduliferum	CXQ0248	China	Hunan	Yichang	From Mangshan hospital to Lin Guan Jv	N24°59'3.8"	E112°51'30"	480	2010/09/03	Xiu-Qin Ci；Xiang-Qin Yu；Pei-Rui Sun	Hsi-Wen Li	2011-04-12	HITBC CXQ0248
Lauraceae	Neolitsea aurata var. paraciculata	CXQ0253	China	Hunan	Yichang	Mangshan Sanping	N25°24′0.80″	E112°56'55.72"	833	2010/09/04	Xiu-Qin Ci；Xiang-Qin Yu；Pei-Rui Sun	Hsi-Wen Li	2010-09-16	HITBC CXQ0253
Lauraceae	Cinnamomum parthenoxylon	CXQ0255	China	Hunan	Yichang	Mangshan Sanping	N25°24′0.80″	E112°56'55.72"	817	2010/09/04	Xiu-Qin Ci；Xiang-Qin Yu；Pei-Rui Sun	Hsi-Wen Li	2010-09-16	HITBC CXQ0255
Lauraceae	Cinnamomum subavenium	CXQ0257	China	Hunan	Yichang	Mangshan Sanping	N25°24′0.80″	E112°56'55.72"	839	2010/09/04	Xiu-Qin Ci；Xiang-Qin Yu；Pei-Rui Sun	Hsi-Wen Li	2010-09-16	HITBC CXQ0257
Lauraceae	Machilus pauhoi	CXQ0259	China	Hunan	Yichang	Mangshan Sanping	N25°24′0.80″	E112°56'55.72"	600	2010/09/04	Xiu-Qin Ci；Xiang-Qin Yu；Pei-Rui Sun	Hsi-Wen Li	2010-09-16	HITBC CXQ0259
Lauraceae	Litsea elongata	CXQ0266	China	Hunan	Yichang	Mangshan Sanping	N25°24′0.80″	E112°56'55.72"	650	2010/09/04	Xiu-Qin Ci；Xiang-Qin Yu；Pei-Rui Sun	Hsi-Wen Li	2010-09-16	HITBC CXQ0266
Lauraceae	Machilus thunbergii	CXQ0278	China	Hunan	Yichang	Mangshan fengziping	N25°24′2.78″	E112°56'55.72"	550	2010/09/04	Xiu-Qin Ci；Xiang-Qin Yu；Pei-Rui Sun	Hsi-Wen Li	2010-09-16	HITBC CXQ0278
Lauraceae	Beilschmiedia robusta	CXQ0279	China	Hunan	Yichang	Mangshan fengziping	N25°24′2.78″	E112°56'55.72"	550	2010/09/04	Xiu-Qin Ci；Xiang-Qin Yu；Pei-Rui Sun	Hsi-Wen Li	2010-09-16	HITBC CXQ0279
Lauraceae	Neolitsea shingningensis	CXQ0282	China	Hunan	Yichang	Mangshan Tiantai Mountain	N24°59′16.35″	E112°53'13.42"	1577	2010/09/05	Xiu-Qin Ci；Xiang-Qin Yu；Pei-Rui Sun	Hsi-Wen Li	2010-09-16	HITBC CXQ0282
Lauraceae	Lindera fragrans	CXQ0284	China	Hunan	Yichang	Mangshan Tiantai Mountain	N24°59′16.35″	E112°53'13.42"	1583	2010/09/05	Xiu-Qin Ci；Xiang-Qin Yu；Pei-Rui Sun	Hsi-Wen Li	2010-09-16	HITBC CXQ0284
Lauraceae	Neolitsea shingningensis	CXQ0286	China	Hunan	Yichang	Mangshan Tiantai Mountain	N24°59′16.35″	E112°53'13.42"	1585	2010/09/05	Xiu-Qin Ci；Xiang-Qin Yu；Pei-Rui Sun	Hsi-Wen Li	2010-09-16	HITBC CXQ0286
Lauraceae	Cinnamomum pauciflorum	CXQ0287	China	Hunan	Yichang	Mangshan Sijidianzhan	N25°24′1.77″	E112°56'55.72"	517	2010/09/05	Xiu-Qin Ci；Xiang-Qin Yu；Pei-Rui Sun	Hsi-Wen Li	2010-09-16	HITBC CXQ0287
Lauraceae	Neolitsea aurata var. paraciculata	CXQ0296	China	Hunan	Yichang	Mangshan Sijidianzhan	N25°24′1.78″	E112°56'55.72"	517	2010/09/05	Xiu-Qin Ci；Xiang-Qin Yu；Pei-Rui Sun	Hsi-Wen Li	2010-09-17	HITBC CXQ0296
Lauraceae	Machilus thunbergii	CXQ0305	China	Zhejiang	Hangzhou	Hangzhou Botanical Garden	N30°15′12.69″	E120°07′13.66″	38	2010/09/08	Xiu-Qin Ci；Xiang-Qin Yu；Pei-Rui Sun	Hsi-Wen Li	2010-09-16	HITBC CXQ0305
Lauraceae	Phoebe sheareri	CXQ0308	China	Zhejiang	Hangzhou	Hangzhou Botanical Garden	N30°15′12.69″	E120°07′13.66″	38	2010/09/08	Xiu-Qin Ci；Xiang-Qin Yu；Pei-Rui Sun	Hsi-Wen Li	2010-09-16	HITBC CXQ0308
Lauraceae	Litsea rotundifolia var. oblongifolia	CXQ0311	China	Zhejiang	Hangzhou	Hangzhou Botanical Garden	N30°15′12.69″	E120°07′13.66″	38	2010/09/08	Xiu-Qin Ci；Xiang-Qin Yu；Pei-Rui Sun	Hsi-Wen Li	2010-09-16	HITBC CXQ0311
Lauraceae	Litsea coreana var. lanuginosa	CXQ0312	China	Zhejiang	Hangzhou	Hangzhou Botanical Garden	N30°15′12.69″	E120°07′13.66″	38	2010/09/08	Xiu-Qin Ci；Xiang-Qin Yu；Pei-Rui Sun	Hsi-Wen Li	2010-09-16	HITBC CXQ0312
Lauraceae	Neolitsea sericea	CXQ0315	China	Zhejiang	Hangzhou	Hangzhou Botanical Garden	N30°15′12.69″	E120°07′13.66″	38	2010/09/08	Xiu-Qin Ci；Xiang-Qin Yu；Pei-Rui Sun	Hsi-Wen Li	2010-09-16	HITBC CXQ0315
Lauraceae	Neolitsea sericea	CXQ0316	China	Zhejiang	Hangzhou	Hangzhou Botanical Garden	N30°15′12.69″	E120°07′13.66″	38	2010/09/08	Xiu-Qin Ci；Xiang-Qin Yu；Pei-Rui Sun	Hsi-Wen Li	2010-09-16	HITBC CXQ0316
Lauraceae	Neolitsea sericea	CXQ0317	China	Zhejiang	Hangzhou	Hangzhou Botanical Garden	N30°15′12.69″	E120°07′13.66″	38	2010/09/08	Xiu-Qin Ci；Xiang-Qin Yu；Pei-Rui Sun	Hsi-Wen Li	2010-09-16	HITBC CXQ0317
Lauraceae	Lindera praecox	CXQ0320	China	Zhejiang	Hangzhou	Hangzhou Botanical Garden	N30°15′12.69″	E120°07′13.66″	38	2010/09/08	Xiu-Qin Ci；Xiang-Qin Yu；Pei-Rui Sun	Hsi-Wen Li	2010-09-16	HITBC CXQ0320
Lauraceae	Cinnamomum subavenium	CXQ0321	China	Zhejiang	Hangzhou	Hangzhou Botanical Garden	N30°15′12.69″	E120°07′13.66″	38	2010/09/08	Xiu-Qin Ci；Xiang-Qin Yu；Pei-Rui Sun	Hsi-Wen Li	2010-09-16	HITBC CXQ0321
Lauraceae	Lindera fruticosa	CXQ0330	China	Zhejiang	Hangzhou	Hangzhou Botanical Garden	N30°15′12.69″	E120°07′13.66″	38	2010/09/08	Xiu-Qin Ci；Xiang-Qin Yu；Pei-Rui Sun	Hsi-Wen Li	2010-09-16	HITBC CXQ0330
Lauraceae	Neolitsea aurata var. paraciculata	CXQ0332	China	Zhejiang	Hangzhou	Hangzhou Botanical Garden	N30°15′12.69″	E120°07′13.66″	38	2010/09/08	Xiu-Qin Ci；Xiang-Qin Yu；Pei-Rui Sun	Hsi-Wen Li	2010-09-16	HITBC CXQ0332
Lauraceae	Litsea kingii	CXQ0347	China	Zhejiang	Linan	Xitianmuxiang Tianmu Mountain	N30°20′28.48″	E119°26'33.62"	39	2010/09/09	Xiu-Qin Ci；Xiang-Qin Yu；Pei-Rui Sun	Hsi-Wen Li	2010-09-16	HITBC CXQ0347
Lauraceae	Litsea coreana var. lanuginosa	CXQ0356	China	Zhejiang	Linan	Xitianmuxiang Tianmu Mountain	N30°20'30"	E119°25'59.1"	1078	2010/09/09	Xiu-Qin Ci；Xiang-Qin Yu；Pei-Rui Sun	Hsi-Wen Li	2010-09-16	HITBC CXQ0356
Lauraceae	Lindera praecox	CXQ0357	China	Zhejiang	Linan	Xitianmuxiang Tianmu Mountain	N30°20'28.1"	E119°25'58"	1098	2010/09/09	Xiu-Qin Ci；Xiang-Qin Yu；Pei-Rui Sun	Hsi-Wen Li	2010-09-16	HITBC CXQ0357
Lauraceae	Lindera reflexa	CXQ0360	China	Zhejiang	Linan	Xitianmuxiang Tianmu Mountain	N30°20′31.23″	E119°26′43.81"	600	2010/09/09	Xiu-Qin Ci；Xiang-Qin Yu；Pei-Rui Sun	Hsi-Wen Li	2010-09-16	HITBC CXQ0360
Lauraceae	Phoebe chekiangensis	CXQ0363	China	Zhejiang	Linan	Xitianmuxiang Tianmu Mountain	N30°20′10.18″	E119°26'8.92"	976	2010/09/09	Xiu-Qin Ci；Xiang-Qin Yu；Pei-Rui Sun	Hsi-Wen Li	2010-09-16	HITBC CXQ0363
Lauraceae	Lindera fruticosa	CXQ0364	China	Zhejiang	Linan	Xitianmuxiang Tianmu Mountain	N30°20′10.18″	E119°26'8.92"	861	2010/09/09	Xiu-Qin Ci；Xiang-Qin Yu；Pei-Rui Sun	Hsi-Wen Li	2010-09-16	HITBC CXQ0364
Lauraceae	Phoebe sheareri	CXQ0365	China	Zhejiang	Linan	Xitianmuxiang Tianmu Mountain	N30°20′9.16″	E119°31'11.44″	859	2010/09/09	Xiu-Qin Ci；Xiang-Qin Yu；Pei-Rui Sun	Hsi-Wen Li	2010-09-16	HITBC CXQ0365
Lauraceae	Cinnamomum burmannii	CXQ0368	China	Zhejiang	Linan	Xitianmuxiang Tianmu Mountain	N30°20'14.8"	E119°26'5.3"	859	2010/09/09	Xiu-Qin Ci；Xiang-Qin Yu；Pei-Rui Sun	Hsi-Wen Li	2010-09-16	HITBC CXQ0368
Lauraceae	Phoebe chekiangensis	CXQ0376	China	Zhejiang	Linan	Xitianmuxiang Tianmu Mountain	N30°18′28.04″	E119°27'3.32"	859	2010/09/10	Xiu-Qin Ci；Xiang-Qin Yu；Pei-Rui Sun	Hsi-Wen Li	2010-09-16	HITBC CXQ0376
Lauraceae	Lindera reflexa	CXQ0382	China	Zhejiang	Linan	Xitianmuxiang Tianmu Mountain	N30°18′28.05″	E119°27′3.33"	386	2010/09/10	Xiu-Qin Ci；Xiang-Qin Yu；Pei-Rui Sun	Hsi-Wen Li	2010-09-16	HITBC CXQ0382
Lauraceae	Cinnamomum camphora	CXQ0384	China	Zhejiang	Linan	Xitianmuxiang Tianmu Mountain	N30°19'27.6"	E119°26'27.7"	411	2010/09/10	Xiu-Qin Ci；Xiang-Qin Yu；Pei-Rui Sun	Hsi-Wen Li	2010-09-16	HITBC CXQ0384
Lauraceae	Lindera praecox	CXQ0395	China	Zhejiang	Wenzhou	Yueqing Yandang Mountain National Forest Park	N28°22′8.84″	E121°02′23.83″	203	2010/09/11	Xiu-Qin Ci；Xiang-Qin Yu；Pei-Rui Sun	Hsi-Wen Li	2010-09-16	HITBC CXQ0395
Lauraceae	Machilus velutina	CXQ0397	China	Zhejiang	Wenzhou	Yueqing Yandang Mountain National Forest Park	N28°22′8.84″	E121°02′23.83″	224	2010/09/11	Xiu-Qin Ci；Xiang-Qin Yu；Pei-Rui Sun	Hsi-Wen Li	2010-09-16	HITBC CXQ0397
Lauraceae	Litsea cubeba	CXQ0402	China	Zhejiang	Wenzhou	Yueqing Yandang Mountain National Forest Park	N28°22′8.84″	E121°02′23.83″	203	2010/09/11	Xiu-Qin Ci；Xiang-Qin Yu；Pei-Rui Sun	Hsi-Wen Li	2010-09-16	HITBC CXQ0402
Lauraceae	Litsea coreana var. lanuginosa	CXQ0404	China	Zhejiang	Wenzhou	Yueqing Yandang Mountain State-owned forest farm	N28°22′8.84″	E121°02′23.83″	150	2010/09/11	Xiu-Qin Ci；Xiang-Qin Yu；Pei-Rui Sun	Hsi-Wen Li	2010-09-16	HITBC CXQ0404
Lauraceae	Cinnamomum camphora	CXQ0405	China	Zhejiang	Wenzhou	Yueqing Yandang Mountain State-owned forest farm	N28°22'11.0"	E121°05'41.8"	203	2010/09/11	Xiu-Qin Ci；Xiang-Qin Yu；Pei-Rui Sun	Hsi-Wen Li	2011-04-13	HITBC CXQ0405
Lauraceae	Machilus thunbergii	CXQ0406	China	Zhejiang	Wenzhou	Yueqing Yandang Mountain Fangdong	N28°22'11.0"	E121°05'41.8"	203	2010/09/13	Xiu-Qin Ci；Xiang-Qin Yu；Pei-Rui Sun	Hsi-Wen Li	2010-09-16	HITBC CXQ0406
Lauraceae	Machilus pauhoi	CXQ0407	China	Zhejiang	Wenzhou	Yueqing Yandang Mountain Fangdong	N28°21'43.7"	E121°04'35.0"	254	2010/09/13	Xiu-Qin Ci；Xiang-Qin Yu；Pei-Rui Sun	Hsi-Wen Li	2010-09-16	HITBC CXQ0407
Lauraceae	Machilus velutina	CXQ0408	China	Zhejiang	Wenzhou	Yueqing Yandang Mountain Fangdong	N28°22'47.7"	E121°04'49.9"	279	2010/09/13	Xiu-Qin Ci；Xiang-Qin Yu；Pei-Rui Sun	Hsi-Wen Li	2010-09-16	HITBC CXQ0408
Lauraceae	Machilus thunbergii	CXQ0409	China	Zhejiang	Wenzhou	Yueqing Yandang Mountain Fangdong	N28°21'51.4"	E121°04'58.8"	279	2010/09/13	Xiu-Qin Ci；Xiang-Qin Yu；Pei-Rui Sun	Hsi-Wen Li	2010-09-16	HITBC CXQ0409
Lauraceae	Phoebe chekiangensis	CXQ0412	China	Zhejiang	Wenzhou	Yueqing Yandang Mountain Fangdong	N28°21'51.4"	E121°04'58.9"	279	2010/09/14	Xiu-Qin Ci；Xiang-Qin Yu；Pei-Rui Sun	Hsi-Wen Li	2010-09-16	HITBC CXQ0412
Lauraceae	Litsea rubescens	CXQ0414	China	Sichuan	Yaan	From Tianquan county Liziping to Shimian	N30°09′15.34″	E102°51′43.51″	880	2010/10/18	Xiu-Qin Ci；Xiang-Qin Yu；Pei-Rui Sun	Hsi-Wen Li	2010-10-30	HITBC CXQ0414
Lauraceae	Cinnamomum longepaniculatum	CXQ0416	China	Sichuan	Yaan	From Tianquan county Liziping to Shimian	N30°04'23.4"	E102°08'37.6"	916	2010/10/18	Xiu-Qin Ci；Xiang-Qin Yu；Pei-Rui Sun	Hsi-Wen Li	2011-04-13	HITBC CXQ0416
Lauraceae	Machilus chuanchienensis	CXQ0419	China	Sichuan	Yaan	Beside Tianquan county Erlangshan Labahe	N30°04'23.4"	E102°08'37.6"	916	2010/10/18	Xiu-Qin Ci；Xiang-Qin Yu；Pei-Rui Sun	Hsi-Wen Li	2010-10-30	HITBC CXQ0419
Lauraceae	Litsea rubescens	CXQ0422	China	Sichuan	Yaan	Tianquan county Erlangshan Labahe	N30°05'40"	E102°24'49.5"	1548	2010/10/18	Xiu-Qin Ci；Xiang-Qin Yu；Pei-Rui Sun	Hsi-Wen Li	2010-10-30	HITBC CXQ0422
Lauraceae	Machilus chuanchienensis	CXQ0423	China	Sichuan	Yaan	Tianquan county Erlangshan Labahe	N30°05'40"	E102°24'49.5"	1548	2010/10/18	Xiu-Qin Ci；Xiang-Qin Yu；Pei-Rui Sun	Hsi-Wen Li	2010-10-30	HITBC CXQ0423
Lauraceae	Lindera megaphylla	CXQ0424	China	Sichuan	Yaan	Tianquan county Erlangshan Labahe	N30°05'40"	E102°24'49.5"	1548	2010/10/18	Xiu-Qin Ci；Xiang-Qin Yu；Pei-Rui Sun	Hsi-Wen Li	2010-10-30	HITBC CXQ0424
Lauraceae	Lindera pulcherrima var.hemsleyana	CXQ0425	China	Sichuan	Yaan	Tianquan county Erlangshan Labahe	N30°05'40"	E102°24'49.5"	1548	2010/10/18	Xiu-Qin Ci；Xiang-Qin Yu；Pei-Rui Sun	Hsi-Wen Li	2010-10-30	HITBC CXQ0425
Lauraceae	Phoebe tavoyana	CXQ0426	China	Sichuan	Yaan	Tianquan county Erlangshan Labahe	N30°05'40"	E102°24'49.5"	1548	2010/10/18	Xiu-Qin Ci；Xiang-Qin Yu；Pei-Rui Sun	Hsi-Wen Li	2010-10-30	HITBC CXQ0426
Lauraceae	Machilus ichangensis	CXQ0430	China	Sichuan	Yaan	Tianquan county Erlangshan Labahe	N30°05'40"	E102°24'49.5"	1548	2010/10/18	Xiu-Qin Ci；Xiang-Qin Yu；Pei-Rui Sun	Hsi-Wen Li	2010-10-30	HITBC CXQ0430
Lauraceae	Machilus ichangensis	CXQ0432	China	Sichuan	Yaan	Tianquan county Erlangshan Labahe	N30°05'40"	E102°24'49.5"	1548	2010/10/18	Xiu-Qin Ci；Xiang-Qin Yu；Pei-Rui Sun	Hsi-Wen Li	2010-10-30	HITBC CXQ0432
Lauraceae	Machilus ichangensis	CXQ0433	China	Sichuan	Yaan	Tianquan county Erlangshan Labahe	N30°05'40"	E102°24'49.5"	1548	2010/10/18	Xiu-Qin Ci；Xiang-Qin Yu；Pei-Rui Sun	Hsi-Wen Li	2010-10-30	HITBC CXQ0433
Lauraceae	Machilus chuanchienensis	CXQ0434	China	Sichuan	Leshan	Emei county Emei Mountain	N29°34'53.8"	E103°23'30.4"	928	2010/10/19	Jie Li；Xiang-Qin Yu et al.	Hsi-Wen Li	2010-10-30	HITBC CXQ0434
Lauraceae	Litsea wilsonii	CXQ0435	China	Sichuan	Leshan	Emei county Emei Mountain	N29°34'53.8"	E103°23'30.4"	928	2010/10/19	Jie Li；Xiang-Qin Yu et al.	Hsi-Wen Li	2010-10-30	HITBC CXQ0435
Lauraceae	Cinnamomum longepaniculatum	CXQ0437	China	Sichuan	Leshan	Emei county Emei Mountain	N29°34'53.8"	E103°23'30.4"	928	2010/10/19	Jie Li；Xiang-Qin Yu et al.	Hsi-Wen Li	2011-04-13	HITBC CXQ0437
Lauraceae	Cinnamomum wilsonii	CXQ0440	China	Sichuan	Leshan	Emei county Emei Mountain	N29°34'53.8"	E103°23'30.4"	831	2010/10/19	Jie Li；Xiang-Qin Yu et al.	Hsi-Wen Li	2010-10-30	HITBC CXQ0440
Lauraceae	Actinodaphne cupularis	CXQ0443	China	Sichuan	Leshan	Emei county Emei Mountain	N29°34'53.8"	E103°23'30.4"	831	2010/10/19	Jie Li；Xiang-Qin Yu et al.	Hsi-Wen Li	2010-10-30	HITBC CXQ0443
Lauraceae	Litsea wilsonii	CXQ0446	China	Sichuan	Leshan	Emei county Emei Mountain	N29°34'53.8"	E103°23'30.4"	831	2010/10/19	Jie Li；Xiang-Qin Yu et al.	Hsi-Wen Li	2010-10-30	HITBC CXQ0446
Lauraceae	Cinnamomum longepaniculatum	CXQ0452	China	Sichuan	Leshan	Emei county Emei Mountain	N29°31'32.6"	E103°46'37"	380	2010/10/20	Jie Li；Xiang-Qin Yu et al.	Hsi-Wen Li	2011-04-13	HITBC CXQ0452
Lauraceae	Phoebe neurantha	CXQ0453	China	Sichuan	Chengdu	Dujiangyan Qingcheng Mountain	N30°53'50.2"	E103°34'20.6"	768	2010/10/21	Jie Li；Xiang-Qin Yu et al.	Hsi-Wen Li	2010-10-30	HITBC CXQ0453
Lauraceae	Actinodaphne cupularis	CXQ0454	China	Sichuan	Chengdu	Dujiangyan Qingcheng Mountain	N30°53'50.2"	E103°34'20.6"	768	2010/10/21	Jie Li；Xiang-Qin Yu et al.	Hsi-Wen Li	2010-10-30	HITBC CXQ0454
Lauraceae	Litsea wilsonii	CXQ0458	China	Sichuan	Chengdu	Dujiangyan Qingcheng Mountain	N30°53'50.2"	E103°34'20.6"	768	2010/10/21	Jie Li；Xiang-Qin Yu et al.	Hsi-Wen Li	2010-10-30	HITBC CXQ0458
Lauraceae	Machilus sichuanensis	CXQ0460	China	Sichuan	Chengdu	Dujiangyan Qingcheng Mountain	N30°53'50.2"	E103°34'20.6"	768	2010/10/21	Jie Li；Xiang-Qin Yu et al.	Hsi-Wen Li	2010-10-30	HITBC CXQ0460
Lauraceae	Machilus sichuanensis	CXQ0462	China	Sichuan	Chengdu	Dujiangyan Qingcheng Mountain	N30°53'50.2"	E103°34'20.6"	768	2010/10/21	Jie Li；Xiang-Qin Yu et al.	Hsi-Wen Li	2010-10-30	HITBC CXQ0462
Lauraceae	Machilus sichuanensis	CXQ0465	China	Sichuan	Chengdu	Dujiangyan Qingcheng Mountain	N30°53'50.2"	E103°34'20.6"	768	2010/10/21	Jie Li；Xiang-Qin Yu et al.	Hsi-Wen Li	2010-10-30	HITBC CXQ0465
Lauraceae	Lindera megaphylla	CXQ0466	China	Sichuan	Chengdu	Dujiangyan Qingcheng Mountain	N30°53'50.2"	E103°34'20.6"	768	2010/10/21	Jie Li；Xiang-Qin Yu et al.	Hsi-Wen Li	2010-10-30	HITBC CXQ0466
Lauraceae	Actinodaphne cupularis	CXQ0467	China	Sichuan	Chengdu	Dujiangyan Qingcheng Mountain	N30°53'50.2"	E103°34'20.6"	768	2010/10/21	Jie Li；Xiang-Qin Yu et al.	Hsi-Wen Li	2010-10-30	HITBC CXQ0467
Lauraceae	Lindera pulcherrima var.hemsleyana	CXQ0468	China	Sichuan	Chengdu	Li County Huapenggou	N31°24'3.2"	E102°58'54.2"	2380	2010/10/23	Jie Li；Xiang-Qin Yu et al.	Hsi-Wen Li	2010-10-30	HITBC CXQ0468
Lauraceae	Neolitsea velutina	CXQ0472	China	Chongqing	Chongqing	Beian Jinyun Mountain Jinyun temple	N29°49'25"	E106°23'35.5"	800	2010/06/06	Xiu-Qin Ci	Hsi-Wen Li	2010-06-15	HITBC CXQ0472
Lauraceae	Cinnamomum glanduliferum	CXQ0473	China	Chongqing	Chongqing	Beian Jinyun Mountain Jinyun temple	N29°49'25"	E106°23'35.5"	800	2010/06/06	Xiu-Qin Ci	Hsi-Wen Li	2010-06-15	HITBC CXQ0473
Lauraceae	Neolitsea velutina	CXQ0474	China	Chongqing	Chongqing	Beian Jinyun Mountain Jinyun temple	N29°49'25"	E106°23'35.5"	800	2010/06/06	Xiu-Qin Ci	Hsi-Wen Li	2010-06-15	HITBC CXQ0474
Lauraceae	Neolitsea velutina	CXQ0475	China	Chongqing	Chongqing	Beian Jinyun Mountain Jinyun temple	N29°49'29"	E106°23'30"	850	2010/06/06	Xiu-Qin Ci	Hsi-Wen Li	2010-06-15	HITBC CXQ0475
Lauraceae	Neolitsea velutina	CXQ0478	China	Yunnan	Chongqing	Beian Jinyun Mountain	N29°49'27.6"	E106°23'31"	785	2010/06/06	Xiu-Qin Ci	Hsi-Wen Li	2010-06-15	HITBC CXQ0478
Lauraceae	Cinnamomum parthenoxylon	CXQ09001	China	Yunnan	Wenshan	Yaodian Forest farm	N23°18'00.5"	E103°56'00.1"	1530	2010/06/07	Xiu-Qin Ci；Meng-Meng Lu；Pei-Rui Sun	Hsi-Wen Li	2010-06-15	HITBC CXQ09001
Lauraceae	Litsea cubeba	CXQ09003	China	Yunnan	Wenshan	Yaodian Forest farm	N23°18'11.2"	E103°56'8.1"	1578	2010/06/07	Xiu-Qin Ci；Meng-Meng Lu；Pei-Rui Sun	Hsi-Wen Li	2010-06-15	HITBC CXQ09003
Lauraceae	Iteadaphne caudata	CXQ09004	China	Yunnan	Wenshan	Yaodian Forest farm	N23°18'15.8"	E103°56'9.9"	1597	2010/06/07	Xiu-Qin Ci；Meng-Meng Lu；Pei-Rui Sun	Hsi-Wen Li	2010-06-15	HITBC CXQ09004
Lauraceae	Iteadaphne caudata	CXQ09006	China	Yunnan	Wenshan	Yaodian Forest farm	N23°18'25.9"	E103°56'19.8"	1661	2010/06/07	Xiu-Qin Ci；Meng-Meng Lu；Pei-Rui Sun	Hsi-Wen Li	2010-06-15	HITBC CXQ09005
Lauraceae	Lindera communis	CXQ09005	China	Yunnan	Wenshan	Yaodian Forest farm	N23°18'29"	E103°56'24.6"	1672	2010/06/07	Xiu-Qin Ci；Meng-Meng Lu；Pei-Rui Sun	Hsi-Wen Li	2010-06-15	HITBC CXQ09006
Lauraceae	Litsea honghoensis	CXQ09007	China	Yunnan	Wenshan	Yaodian Forest farm	N23°18'40.8"	E103°55'56"	1768	2010/06/08	Xiu-Qin Ci；Meng-Meng Lu；Pei-Rui Sun	Hsi-Wen Li	2010-06-15	HITBC CXQ09007
Lauraceae	Phoebe neurantha	CXQ09023	China	Yunnan	Wenshan	Yaodian Forest farm	N23°18'40.8"	E103°55'56"	1708	2010/06/08	Xiu-Qin Ci；Meng-Meng Lu；Pei-Rui Sun	Hsi-Wen Li	2010-06-15	HITBC CXQ09023
Lauraceae	Cinnamomum burmannii	CXQ09025	China	Yunnan	Wenshan	Yaodian Forest farm	N23°18'40.9"	E103°55'57"	1769	2010/06/09	Xiu-Qin Ci；Meng-Meng Lu；Pei-Rui Sun	Hsi-Wen Li	2010-06-15	HITBC CXQ09025
Lauraceae	Litsea honghoensis	CXQ09051	China	Yunnan	Wenshan	Yaodian Forest farm	N23°18'40.10"	E103°55'58"	1754	2010/06/10	Xiu-Qin Ci；Meng-Meng Lu；Pei-Rui Sun	Hsi-Wen Li	2010-06-16	HITBC CXQ09051
Lauraceae	Litsea rubescens	CXQ09053	China	Yunnan	Xichou	Xiaoqiaogou Forest farm	N23°21'34.7"	E104°41'4.60"	1614	2009/11/12	Xiu-Qin Ci；Meng-Meng Lu；Pei-Rui Sun	Hsi-Wen Li	2009-11-20	HITBC CXQ09053
Lauraceae	Litsea elongata	CXQ09059	China	Yunnan	Xichou	Xiaoqiaogou Forest farm	N23°21'22.0"	E104°41'4.30"	1600	2009/11/12	Xiu-Qin Ci；Meng-Meng Lu；Pei-Rui Sun	Hsi-Wen Li	2009-11-20	HITBC CXQ09059
Lauraceae	Lindera metcalfiana	CXQ09063	China	Yunnan	Xichou	Xiaoqiaogou Forest farm	N23°21'24.8"	E104°41'14"	1605	2009/11/12	Xiu-Qin Ci；Meng-Meng Lu；Pei-Rui Sun	Hsi-Wen Li	2009-11-20	HITBC CXQ09063
Lauraceae	Lindera metcalfiana	CXQ09068	China	Yunnan	Xichou	Xiaoqiaogou Forest farm	N23°21'25.8"	E104°41'15.8"	1597	2009/11/12	Xiu-Qin Ci；Meng-Meng Lu；Pei-Rui Sun	Hsi-Wen Li	2009-11-20	HITBC CXQ09068
Lauraceae	Phoebe macrocarpa	CXQ09097	China	Yunnan	Xichou	Fadou Forest farm	N23°22'26.1"	E104°46'59.4"	1550	2009/11/13	Xiu-Qin Ci；Meng-Meng Lu；Pei-Rui Sun	Hsi-Wen Li	2009-11-20	HITBC CXQ09097
Lauraceae	Lindera thomsonii	CXQ09103	China	Yunnan	Xichou	Fadou Forest farm	N23°22'42"	E104°46'58.6"	1576	2009/11/13	Xiu-Qin Ci；Meng-Meng Lu；Pei-Rui Sun	Hsi-Wen Li	2009-11-20	HITBC CXQ09103
Lauraceae	Cinnamomum appelianum	CXQ09105	China	Yunnan	Xichou	Fadou Forest farm	N23°22'26.1"	E104°46'59.4"	1550	2009/11/13	Xiu-Qin Ci；Meng-Meng Lu；Pei-Rui Sun	Hsi-Wen Li	2009-11-20	HITBC CXQ09105
Lauraceae	Litsea kingii	CXQ09109	China	Yunnan	Xichou	Fadou Forest farm	N23°22'42"	E104°46'58.6"	1576	2009/11/13	Xiu-Qin Ci；Meng-Meng Lu；Pei-Rui Sun	Hsi-Wen Li	2009-11-20	HITBC CXQ09109
Lauraceae	Neocinnamomum delavayi	CXQ1001	China	Yunnan	Jingdong	Taizhong town Daheiyakou	N24°29′50.45″	E100°56′23.04″	1400	2012/04/12	Jie Li；Lang Li；Meng-Meng Lu	Hsi-Wen Li	2012/05/20	HITBC CXQ1001
Lauraceae	Neocinnamomum delavayi	CXQ1015	China	Yunnan	Jingdong	Taizhong town Daheiyakou	N24°29′50.45″	E100°56′23.04″	1400	2012/04/12	Jie Li；Lang Li；Meng-Meng Lu	Hsi-Wen Li	2012/05/20	HITBC CXQ1015
Lauraceae	Machilus robusta	CXQ1017	China	Yunnan	Jingdong	Taizhong town Daheiyakou	N24°29′50.45″	E100°56′23.04″	1400	2012/04/12	Jie Li；Lang Li；Meng-Meng Lu	Hsi-Wen Li	2012/05/20	HITBC CXQ1017
Lauraceae	Neocinnamomum delavayi	CXQ1018	China	Yunnan	Jingdong	Taizhong town Daheiyakou	N24°29′50.45″	E100°56′23.04″	1400	2012/04/12	Jie Li；Lang Li；Meng-Meng Lu	Hsi-Wen Li	2012/05/20	HITBC CXQ1018
Lauraceae	Neocinnamomum delavayi	CXQ1028	China	Yunnan	Jingdong	Taizhong town Daheiyakou	N24°29′50.45″	E100°56′23.04″	1400	2012/04/12	Jie Li；Lang Li；Meng-Meng Lu	Hsi-Wen Li	2012/05/20	HITBC CXQ1028
Lauraceae	Iteadaphne caudata	CXQ1029	China	Yunnan	Jingdong	Taizhong town Daheiyakou	N24°29′50.45″	E100°56′23.04″	1400	2012/04/12	Jie Li；Lang Li；Meng-Meng Lu	Hsi-Wen Li	2012/05/20	HITBC CXQ1029
Lauraceae	Lindera latifolia	CXQ1108	China	Yunnan	Jingdong	Taizhong town Daheiyakou	N24°29′50.45″	E100°56′23.04″	1400	2012/04/13	Jie Li；Lang Li；Meng-Meng Lu	Hsi-Wen Li	2012/05/20	HITBC CXQ1108
Lauraceae	Litsea martabanica	CXQ1113	China	Yunnan	Jingdong	Taizhong town Daheiyakou	N24°29′50.45″	E100°56′23.04″	1400	2012/04/13	Jie Li；Lang Li；Meng-Meng Lu	Hsi-Wen Li	2012/05/20	HITBC CXQ1113
Lauraceae	Lindera latifolia	CXQ1120	China	Yunnan	Jingdong	Taizhong town Daheiyakou	N24°29′50.45″	E100°56′23.04″	1400	2012/04/13	Jie Li；Lang Li；Meng-Meng Lu	Hsi-Wen Li	2012/05/20	HITBC CXQ1120
Lauraceae	Machilus yunnanensis	CXQ1250	China	Yunnan	Jingdong	Taizhong town Daheiyakou	N24°29′50.45″	E100°56′23.04″	1400	2012/04/13	Jie Li；Lang Li；Meng-Meng Lu	Hsi-Wen Li	2012/05/20	HITBC CXQ1250
Lauraceae	Machilus yunnanensis	CXQ1262	China	Yunnan	Jingdong	Taizhong town sankezhuang	N24°22′54.62″	E100°59′6.42"	1320	2012/04/15	Jie Li；Lang Li；Meng-Meng Lu	Hsi-Wen Li	2012/05/20	HITBC CXQ1262
Lauraceae	Phoebe glaucifolia	CXQ1266	China	Yunnan	Jingdong	Taizhong town sankezhuang	N24°22′54.62″	E100°59′6.42"	1320	2012/04/15	Jie Li；Lang Li；Meng-Meng Lu	Hsi-Wen Li	2012/05/20	HITBC CXQ1266
Lauraceae	Litsea martabanica	CXQ1271	China	Yunnan	Jingdong	Taizhong town sankezhuang	N24°22′54.62″	E100°59′6.42″	1320	2012/04/15	Jie Li；Lang Li；Meng-Meng Lu	Hsi-Wen Li	2012/05/20	HITBC CXQ1271
Lauraceae	Phoebe glaucifolia	CXQ1273	China	Yunnan	Jingdong	Taizhong town sankezhuang	N24°22′54.62″	E100°59′6.42″	1320	2012/04/15	Jie Li；Lang Li；Meng-Meng Lu	Hsi-Wen Li	2012/05/20	HITBC CXQ1273
Lauraceae	Machilus yunnanensis	CXQ1276	China	Yunnan	Jingdong	Taizhong town sankezhuang	N24°22′54.62″	E100°59′6.42″	1320	2012/04/15	Jie Li；Lang Li；Meng-Meng Lu	Hsi-Wen Li	2012/05/20	HITBC CXQ1276
Lauraceae	Cinnamomum pittosporoides	CXQ1338	China	Yunnan	Jingdong	Taizhong town sankezhuang	N24°22′54.62″	E100°59′6.42″	1320	2012/04/15	Jie Li；Lang Li；Meng-Meng Lu	Hsi-Wen Li	2012/05/20	HITBC CXQ1338
Lauraceae	Lindera supracostata	CXQ1347	China	Yunnan	Jingdong	Taizhong town Ecological station	N24°29′49.29″	E100°56′23.04″	1315	2012/04/19	Jie Li；Lang Li；Meng-Meng Lu	Hsi-Wen Li	2012/05/20	HITBC CXQ1347
Lauraceae	Lindera supracostata	CXQ1394	China	Yunnan	Jingdong	Taizhong town sankezhuang	N24°22′54.62″	E100°59′6.42″	1335	2012/04/16	Jie Li；Lang Li；Meng-Meng Lu	Hsi-Wen Li	2012/05/20	HITBC CXQ1394
Lauraceae	Lindera supracostata	CXQ1398	China	Yunnan	Jingdong	Taizhong town Xiaoxinchang	N24°29′49.29″	E100°56′23.04″	1345	2012/04/17	Jie Li；Lang Li；Meng-Meng Lu	Hsi-Wen Li	2012/05/20	HITBC CXQ1398
Lauraceae	Neolitsea homilantha	CXQ546	China	Yunnan	Jingdong	Taizhong town Xiaoxinchang	N24°29′49.29″	E100°56′23.04″	1345	2012/04/17	Jie Li；Lang Li；Meng-Meng Lu	Hsi-Wen Li	2012/05/20	HITBC CXQ546
Lauraceae	Machilus longipedicellata	CXQ578	China	Yunnan	Jingdong	Taizhong town Xujiaba 6ha Sample area	N24°32′17.19″	E101°01′6.52"	1435	2011/12/09	Jie Li；Xiu-Qin Ci；Meng-Meng Lu	Hsi-Wen Li	2011/12/15	HITBC CXQ578
Lauraceae	Machilus longipedicellata	CXQ638	China	Yunnan	Jingdong	Taizhong town Xujiaba 7ha Sample area	N24°32′17.97″	E101°01′6.52″	1430	2011/12/09	Jie Li；Xiu-Qin Ci；Meng-Meng Lu	Hsi-Wen Li	2011/12/15	HITBC CXQ638
Lauraceae	Neolitsea chuii	CXQ644	China	Yunnan	Jingdong	Taizhong town Xujiaba 8ha Sample area	N24°32′16.71″	E101°01′6.52″	1435	2011/12/10	Jie Li；Xiu-Qin Ci；Meng-Meng Lu	Hsi-Wen Li	2011/12/15	HITBC CXQ644
Lauraceae	Cinnamomum chago	CXQ690	China	Yunnan	Jingdong	Taizhong town Xujiaba 9ha Sample area	N24°32′16.66″	E101°01′6.52″	1430	2011/12/10	Jie Li；Xiu-Qin Ci；Meng-Meng Lu	Hsi-Wen Li	2011/12/15	HITBC CXQ690
Lauraceae	Machilus longipedicellata	CXQ701	China	Yunnan	Jingdong	Taizhong town Xujiaba 10ha Sample area	N24°32′16.92″	E101°01′6.52″	1435	2011/12/10	Jie Li；Xiu-Qin Ci；Meng-Meng Lu	Hsi-Wen Li	2011/12/15	HITBC CXQ701
Lauraceae	Lindera thomsonii	CXQ714	China	Yunnan	Jingdong	Taizhong town Xujiaba 11ha Sample area	N24°32′16.97″	E101°01′6.52″	1435	2011/12/10	Jie Li；Xiu-Qin Ci；Meng-Meng Lu	Hsi-Wen Li	2011/12/15	HITBC CXQ714
Lauraceae	Machilus longipedicellata	CXQ724	China	Yunnan	Jingdong	Taizhong town Xujiaba 12ha Sample area	N24°32′16.65″	E101°01′6.52″	1435	2011/12/10	Jie Li；Xiu-Qin Ci；Meng-Meng Lu	Hsi-Wen Li	2011/12/15	HITBC CXQ724
Lauraceae	Neolitsea chuii	CXQ730	China	Yunnan	Jingdong	Taizhong town Xujiaba 13ha Sample area	N24°32′16.88″	E101°01′6.52″	1435	2011/12/10	Jie Li；Xiu-Qin Ci；Meng-Meng Lu	Hsi-Wen Li	2011/12/15	HITBC CXQ730
Lauraceae	Neolitsea polycarpa	CXQ738	China	Yunnan	Jingdong	Taizhong town Xujiaba 14ha Sample area	N24°32′16.76″	E101°01′6.52″	1435	2011/12/10	Jie Li；Xiu-Qin Ci；Meng-Meng Lu	Hsi-Wen Li	2011/12/15	HITBC CXQ738
Lauraceae	Lindera thomsonii	CXQ743	China	Yunnan	Jingdong	Taizhong town Xujiaba 15ha Sample area	N24°32′16.80″	E101°01′6.52″	1435	2011/12/10	Jie Li；Xiu-Qin Ci；Meng-Meng Lu	Hsi-Wen Li	2011/12/15	HITBC CXQ743
Lauraceae	Cinnamomum chago	CXQ762	China	Yunnan	Jingdong	Taizhong town Xujiaba 16ha Sample area	N24°32′16.75″	E101°01′6.52″	1435	2011/12/10	Jie Li；Xiu-Qin Ci；Meng-Meng Lu	Hsi-Wen Li	2011/12/15	HITBC CXQ762
Lauraceae	Machilus gamblei	CXQ764	China	Yunnan	Jingdong	Taizhong town Xujiaba 17ha Sample area	N24°32′16.84″	E101°01′6.52″	1435	2011/12/11	Jie Li；Xiu-Qin Ci；Meng-Meng Lu	Hsi-Wen Li	2011/12/15	HITBC CXQ764
Lauraceae	Neolitsea homilantha	CXQ768	China	Yunnan	Jingdong	Taizhong town Xujiaba 18ha Sample area	N24°32′16.80″	E101°01′6.52″	1435	2011/12/11	Jie Li；Xiu-Qin Ci；Meng-Meng Lu	Hsi-Wen Li	2011/12/15	HITBC CXQ768
Lauraceae	Litsea cubeba	CXQ790	China	Yunnan	Jingdong	Taizhong town Xujiaba 19ha Sample area	N24°32′16.76″	E101°01′6.52″	1435	2011/12/11	Jie Li；Xiu-Qin Ci；Meng-Meng Lu	Hsi-Wen Li	2011/12/15	HITBC CXQ790
Lauraceae	Machilus gamblei	CXQ816	China	Yunnan	Jingdong	Taizhong town Xujiaba 20ha Sample area	N24°32′16.75″	E101°01′6.52″	1435	2011/12/11	Jie Li；Xiu-Qin Ci；Meng-Meng Lu	Hsi-Wen Li	2011/12/15	HITBC CXQ816
Lauraceae	Machilus gamblei	CXQ854	China	Yunnan	Jingdong	Taizhong town Xujiaba 21ha Sample area	N24°32′16.80″	E101°01′6.52″	1435	2012/04/18	Jie Li；Lang Li；Meng-Meng Lu	Hsi-Wen Li	2012/05/20	HITBC CXQ854
Lauraceae	Machilus rufipes	CXQ898	China	Yunnan	Jingdong	Taizhong town Xujiaba 22ha Sample area	N24°32′16.80″	E101°01′6.52″	1435	2012/04/18	Jie Li；Lang Li；Meng-Meng Lu	Hsi-Wen Li	2012/05/20	HITBC CXQ898
Lauraceae	Machilus rufipes	CXQ906	China	Yunnan	Jingdong	Taizhong town Xujiaba 23ha Sample area	N24°32′16.77″	E101°01′6.52″	1435	2012/04/19	Jie Li；Lang Li；Meng-Meng Lu	Hsi-Wen Li	2012/05/20	HITBC CXQ906
Lauraceae	Machilus fasciculata	GBOW0040	China	Yunnan	Jingdong	Taizhong town Xujiaba 24ha Sample area	N24°32′16.80″	E101°01′6.52″	1435	2012/04/19	Jie Li；Lang Li；Meng-Meng Lu	Hsi-Wen Li	2012/05/20	HITBC GBOW0040
Lauraceae	Lindera megaphylla	GBOW0083	China	Yunnan	Jingdong	Taizhong town Xujiaba 25ha Sample area	N24°32′16.84″	E101°01′6.52″	1435	2012/04/19	Jie Li；Lang Li；Meng-Meng Lu	Hsi-Wen Li	2012/05/20	HITBC GBOW0083
Lauraceae	Actinodaphne forrestii	GBOW0091	China	Yunnan	Malipo	Xiajinchangxiang	N23°10′27"	E104°49′35″	1490	2010-01-07	DNAbarcoding A Group	Hsi-Wen Li	2010-03-11	HITBC GBOW0091
Lauraceae	Phoebe macrocarpa	GBOW0160	China	Yunnan	Malipo	Xiajinchangxiang	N23°07′45"	E104°45′18″	1892	2010-01-07	DNAbarcoding A Group	Hsi-Wen Li	2010-03-11	HITBC GBOW0160
Lauraceae	Machilus minutiflora	GBOW0206	China	Yunnan	Malipo	Xiajinchangxiang	N23°07′45"	E104°45′18″	1892	2010-01-07	DNAbarcoding A Group	Hsi-Wen Li	2010-03-11	HITBC GBOW0206
Lauraceae	Actinodaphne forrestii	GBOW0216	China	Yunnan	Malipo	Xiajinchangxiang 309 Boundary tablet	N23°07′45.41″	E104°51′29.25″	1820	2010-01-08	DNAbarcoding A Group	Hsi-Wen Li	2010-03-11	HITBC GBOW0216
Lauraceae	Lindera thomsonii	GBOW0222	China	Yunnan	Malipo	Xiajinchangxiang	N23°9′56″	E104°50′05″	1566	2010-01-09	DNAbarcoding A Group	Hsi-Wen Li	2010-03-11	HITBC GBOW0222
Lauraceae	Neolitsea homilantha	GBOW0237	China	Yunnan	Malipo	Xiajinchangxiang	N23°9′50″	E104°49′35″	1655	2010-01-09	DNAbarcoding A Group	Hsi-Wen Li	2010-03-11	HITBC GBOW0237
Lauraceae	Machilus robusta	GBOW0246	China	Yunnan	Malipo	Xiajinchangxiang	N23°9′21″	E104°49′46″	1746	2010-01-09	DNAbarcoding A Group	Hsi-Wen Li	2010-03-11	HITBC GBOW0246
Lauraceae	Actinodaphne forrestii	GBOW0250	China	Yunnan	Malipo	Xiajinchangxiang Zhongzhaishuishaba	N23°10′01"	E104°47′41″	1975	2010-01-09	DNAbarcoding A Group	Hsi-Wen Li	2010-03-11	HITBC GBOW0250
Lauraceae	Machilus fasciculata	GBOW0274	China	Yunnan	Malipo	Xiajinchangxiang Zhongzhaitianba	N23°11′22″	E104°47′24″	1492	2010-01-09	DNAbarcoding A Group	Hsi-Wen Li	2010-03-11	HITBC GBOW0274
Lauraceae	Litsea rotundifolia var.oblongifolia	GBOW0315	China	Yunnan	Malipo	Xiajinchangxiang Zhongzhaitianba	N23°11′22″	E104°47′24″	1492	2010-01-09	DNAbarcoding A Group	Hsi-Wen Li	2010-03-11	HITBC GBOW0315
Lauraceae	Lindera metcalfiana var. dictyophylla	GBOW0336	China	Yunnan	Malipo	Xiajinchangxiang Dengjainiaoji	N23°10′35.56"	E104°49′27.8″	1493	2010-01-10	DNAbarcoding A Group	Hsi-Wen Li	2010-03-11	HITBC GBOW0336
Lauraceae	Cinnamomum iners	GBOW0374	China	Yunnan	Hekou	Xiajinchangxiang Dengjainiaoji	N23°10′35.41"	E104°49′36.6″	1510	2010-01-10	DNAbarcoding A Group	Hsi-Wen Li	2010-03-11	HITBC GBOW0374
Lauraceae	Actinodaphne obovata	GBOW0400	China	Yunnan	Hekou	From Yaoshan towm to Liangzi village	N22°48′53"	E103°44′25″	1167	2010-01-13	DNAbarcoding A Group	Hsi-Wen Li	2010-03-11	HITBC GBOW0400
Lauraceae	Lindera metcalfiana var. dictyophylla	GBOW0547	China	Yunnan	Hekou	Yaoshan towm Liangzi village	N22°49′45"	E103°43′44″	1280	2010-01-13	DNAbarcoding A Group	Hsi-Wen Li	2010-03-11	HITBC GBOW0547
Lauraceae	Cryptocarya densiflora	GBOW0548	China	Yunnan	Malipo	Yaoshan towm Liangzi village	N22°49′45"	E103°43′44″	1280	2010-01-13	DNAbarcoding A Group	Hsi-Wen Li	2010-03-11	HITBC GBOW0548
Lauraceae	Machilus yunnanensis	GBOW0678	China	Yunnan	Malipo	Mengtong towm Yezhutang	N22°50'50.0"	E104°43'11.0"	1473	2009-01-08	DNAbarcoding A Group	Hsi-Wen Li	2010-03-11	HITBC GBOW0678
Lauraceae	Neolitsea levinei	GBOW0679	China	Yunnan	Maguan	Mengtong towm Yezhutang	N22°50'50.0"	E104°43'11.0"	1473	2009-01-08	DNAbarcoding A Group	Hsi-Wen Li	2010-03-11	HITBC GBOW0679
Lauraceae	Phoebe minutiflora	GBOW0699	China	Yunnan	Maguan	From Bazhai to Gulinqing	N22°49'9.4"	E103°57'14.7"	1596	2009-01-12	DNAbarcoding A Group	Hsi-Wen Li	2010-03-11	HITBC GBOW0699
Lauraceae	Caryodaphnopsis laotica	GBOW0745	China	Yunnan	Maguan	From Bazhai to Gulinqing	N22°49'9.4"	E103°57'14.7"	1596	2010-01-12	DNAbarcoding A Group	Hsi-Wen Li	2010-03-12	HITBC GBOW0745
Lauraceae	Litsea lancifolia var. ellipsoidea	GBOW0779	China	Yunnan	Hekou	From Bazhai to Gulinqing	N22°49'9.4"	E103°57'14.7"	1596	2009-01-12	DNAbarcoding A Group	Hsi-Wen Li	2010-03-11	HITBC GBOW0779
Lauraceae	Iteadaphne caudata	GBOW0825	China	Yunnan	Hekou	Nanxi town Longbao Longyinchong	N22°40'50.9"	E104°1'0.1"	846	2009-01-13	DNAbarcoding A Group	Hsi-Wen Li	2010-03-11	HITBC GBOW0825
Lauraceae	Lindera communis	GBOW0865	China	Yunnan	Hekou	Nanxi town Longbao Qincaitang	N22°33'28.9"	E103°56'43.7"	210	2009-01-13	DNAbarcoding A Group	Hsi-Wen Li	2010-03-11	HITBC GBOW0865
Lauraceae	Cinnamomum iners	GBOW0875	China	Yunnan	Hekou	Yaoshan town Liangzi village Laoqingshuigou	N22°49′58"	E103°44′03″	1314	2010-01-14	DNAbarcoding A Group	Hsi-Wen Li	2010-03-12	HITBC GBOW0875
Lauraceae	Actinodaphne obovata	GBOW0894	China	Yunnan	Hekou	Yaoshan town Liangzi village Liangzihoushan	N22°49′51"	E103°44′09″	1379	2010-01-14	DNAbarcoding A Group	Hsi-Wen Li	2010-03-12	HITBC GBOW0894
Lauraceae	Litsea honghoensis	GBOW0906	China	Yunnan	Jinping	Nanxi town Zhongyangping	N22°39′57"	E104°01′20″	1193	2010-01-15	DNAbarcoding A Group	Hsi-Wen Li	2010-03-12	HITBC GBOW0906
Lauraceae	Machilus grijsii	GBOW0930	China	Yunnan	Jinping	Fenshuiling Nature Reserve Radar Station	N22°52′09"	E103°14′13″	2376	2010-01-16	DNAbarcoding A Group	Hsi-Wen Li	2010-03-12	HITBC GBOW0930
Lauraceae	Machilus grijsii	GBOW0936	China	Yunnan	Jinping	Fenshuiling Nature Reserve Radar Station	N22°52′09"	E103°14′13″	2376	2010-01-16	DNAbarcoding A Group	Hsi-Wen Li	2010-03-12	HITBC GBOW0936
Lauraceae	Caryodaphnopsis henryi	GBOW0969	China	Yunnan	Jinping	Fenshuiling Nature Reserve Radar Station	N22°52′09"	E103°14′13″	2376	2010-01-16	DNAbarcoding A Group	Hsi-Wen Li	2010-03-12	HITBC GBOW0969
Lauraceae	Cinnamomum bejolghota	GBOW0970	China	Yunnan	Jinping	Nafa town Nansong village Laozhaiqinggou	N22°34′41"	E103°02′42″	840	2010-01-17	DNAbarcoding A Group	Hsi-Wen Li	2010-03-12	HITBC GBOW0970
Lauraceae	Lindera metcalfiana var. dictyophylla	GBOW0975	China	Yunnan	Jinping	Nafa town Nansong village Laozhaiqinggou	N22°34′41"	E103°02′42″	840	2010-01-17	DNAbarcoding A Group	Hsi-Wen Li	2010-03-12	HITBC GBOW0975
Lauraceae	Litsea lancifolia var. ellipsoidea	GBOW0985	China	Yunnan	Jinping	Nafa town Nansong village Laozhaiqinggou	N22°34′39"	E103°02′54″	865	2010-01-17	DNAbarcoding A Group	Hsi-Wen Li	2010-03-12	HITBC GBOW0985
Lauraceae	Litsea mollis	GBOW1060	China	Yunnan	Jinping	Nafa town Nansong village Laozhaiqinggou	N22°34′39"	E103°02′54″	865	2010-01-17	DNAbarcoding A Group	Hsi-Wen Li	2010-03-12	HITBC GBOW1060
Lauraceae	Caryodaphnopsis henryi	GBOW1070	China	Yunnan	Jinping	Nafa town Nansong village Laozhaiqinggou	N22°34′39"	E103°02′54″	865	2010-01-17	DNAbarcoding A Group	Hsi-Wen Li	2010-03-12	HITBC GBOW1070
Lauraceae	Caryodaphnopsis henryi	GBOW1071	China	Yunnan	Jinping	Zhemi town Liangziyaozhainanbuhedazhuchong	N22°34′39"	E103°02′54″	865	2010-01-17	DNAbarcoding A Group	Hsi-Wen Li	2010-03-12	HITBC GBOW1071
Lauraceae	Machilus tenuipilis	GBOW1092	China	Yunnan	Jinping	Zhemi town Liangziyaozhainanbuhedazhuchong	N22°34′39"	E103°02′54″	865	2010-01-18	DNAbarcoding A Group	Hsi-Wen Li	2010-03-12	HITBC GBOW1092
Lauraceae	Phoebe neurantha	GBOW1318	China	Yunnan	Jinping	Zhemi town Liangziyaozhai Nanbuhedazhuchong	N22°45′44.56″	E102°39′23.43″	2000	2010-01-18	CBOW	Hsi-Wen Li	2010-03-12	HITBC GBOW1318
Lauraceae	Litsea lancifolia var. ellipsoidea	GBOW1343	China	Yunnan	Jinping	From Adebo town to Jingping county 5km	N22°34′39"	E103°02′54″	865	2009-01-16	DNAbarcoding A Group	Hsi-Wen Li	2010-03-12	HITBC GBOW1343
Lauraceae	Machilus minutiflora	GBOW1428	China	Yunnan	Jinping	Mengla tuomazhai	N22°34′39"	E103°02′54″	865	2009-01-17	DNAbarcoding A Group	Hsi-Wen Li	2010-03-12	HITBC GBOW1428
Lauraceae	Cinnamomum contractum	G023	China	Yunnan	Mengla	Mengla Wengdang village	N22°34′39"	E103°02′54″	865	2009-01-18	DNAbarcoding A Group	Hsi-Wen Li	2010-03-12	HITBC G023
Lauraceae	Beilschmiedia roxburghiana	G065	China	Yunnan	Mengla	Menglun Xishuangbanna Tropical Botanical Garden	N21°41′	E101°25′	570	2012/09	Jie Li；Xiu-Qin Ci；Meng-Meng Lu；Xiao-Cui Huang	Hsi-Wen Li	2012/10	HITBC G065
Lauraceae	Beilschmiedia purpurascens	G079	China	Yunnan	Mengla	Menglun Xishuangbanna Tropical Botanical Garden	N21°41′	E101°25′	570	2012/09	Jie Li；Xiu-Qin Ci；Meng-Meng Lu；Xiao-Cui Huang	Hsi-Wen Li	2012/10	HITBC G079
Lauraceae	Litsea martabanica	G090	China	Yunnan	Mengla	Menglun Xishuangbanna Tropical Botanical Garden	N21°41′	E101°25′	570	2012/09	Jie Li；Xiu-Qin Ci；Meng-Meng Lu；Xiao-Cui Huang	Hsi-Wen Li	2012/10	HITBC G090
Lauraceae	Litsea dilleniifolia	G107	China	Yunnan	Mengla	Menglun Xishuangbanna Tropical Botanical Garden	N21°41′	E101°25′	570	2012/09	Jie Li；Xiu-Qin Ci；Meng-Meng Lu；Xiao-Cui Huang	Hsi-Wen Li	2012/10	HITBC G107
Lauraceae	Lindera metcalfiana	G145	China	Yunnan	Mengla	Menglun Xishuangbanna Tropical Botanical Garden	N21°41′	E101°25′	570	2012/09	Jie Li；Xiu-Qin Ci；Meng-Meng Lu；Xiao-Cui Huang	Hsi-Wen Li	2012/10	HITBC G145
Lauraceae	Beilschmiedia percoriacea	G148	China	Yunnan	Mengla	Menglun Xishuangbanna Tropical Botanical Garden	N21°41′	E101°25′	570	2012/09	Jie Li；Xiu-Qin Ci；Meng-Meng Lu；Xiao-Cui Huang	Hsi-Wen Li	2012/10	HITBC G148
Lauraceae	Beilschmiedia percoriacea	G150	China	Yunnan	Mengla	Menglun Xishuangbanna Tropical Botanical Garden	N21°41′	E101°25′	570	2012/09	Jie Li；Xiu-Qin Ci；Meng-Meng Lu；Xiao-Cui Huang	Hsi-Wen Li	2012/10	HITBC G150
Lauraceae	Phoebe lanceolata	G156	China	Yunnan	Mengla	Menglun Xishuangbanna Tropical Botanical Garden	N21°41′	E101°25′	570	2012/09	Jie Li；Xiu-Qin Ci；Meng-Meng Lu；Xiao-Cui Huang	Hsi-Wen Li	2012/10	HITBC G156
Lauraceae	Phoebe lanceolata	G161	China	Yunnan	Mengla	Menglun Xishuangbanna Tropical Botanical Garden	N21°41′	E101°25′	570	2012/09	Jie Li；Xiu-Qin Ci；Meng-Meng Lu；Xiao-Cui Huang	Hsi-Wen Li	2012/10	HITBC G161
Lauraceae	Beilschmiedia purpurascens	G165	China	Yunnan	Mengla	Menglun Xishuangbanna Tropical Botanical Garden	N21°41′	E101°25′	570	2012/09	Jie Li；Xiu-Qin Ci；Meng-Meng Lu；Xiao-Cui Huang	Hsi-Wen Li	2012/10	HITBC G165
Lauraceae	Beilschmiedia purpurascens	G174	China	Yunnan	Mengla	Menglun Xishuangbanna Tropical Botanical Garden	N21°41′	E101°25′	570	2012/09	Jie Li；Xiu-Qin Ci；Meng-Meng Lu；Xiao-Cui Huang	Hsi-Wen Li	2012/10	HITBC G174
Lauraceae	Beilschmiedia roxburghiana	G188	China	Yunnan	Mengla	Menglun Xishuangbanna Tropical Botanical Garden	N21°41′	E101°25′	570	2012/09	Jie Li；Xiu-Qin Ci；Meng-Meng Lu；Xiao-Cui Huang	Hsi-Wen Li	2012/10	HITBC G188
Lauraceae	Litsea elongata	G196	China	Yunnan	Mengla	Menglun Xishuangbanna Tropical Botanical Garden	N21°41′	E101°25′	570	2012/09	Jie Li；Xiu-Qin Ci；Meng-Meng Lu；Xiao-Cui Huang	Hsi-Wen Li	2012/10	HITBC G196
Lauraceae	Litsea salicifolia	G198	China	Yunnan	Mengla	Menglun Xishuangbanna Tropical Botanical Garden	N21°41′	E101°25′	570	2012/09	Jie Li；Xiu-Qin Ci；Meng-Meng Lu；Xiao-Cui Huang	Hsi-Wen Li	2012/10	HITBC G198
Lauraceae	Beilschmiedia brachythyrsa	J001	China	Yunnan	Mengla	Menglun Xishuangbanna Tropical Botanical Garden	N21°41′	E101°25′	570	2012/09	Jie Li；Xiu-Qin Ci；Meng-Meng Lu；Xiao-Cui Huang	Hsi-Wen Li	2012/10	HITBC J001
Lauraceae	Litsea panamonja	J003	China	Yunnan	Mengla	Menglun Xishuangbanna Tropical Botanical Garden	N21°41′	E101°25′	570	2012/09	Jie Li；Xiu-Qin Ci；Meng-Meng Lu；Xiao-Cui Huang	Hsi-Wen Li	2012/10	HITBC J003
Lauraceae	Beilschmiedia purpurascens	J032	China	Yunnan	Mengla	Menglun Xishuangbanna Tropical Botanical Garden	N21°41′	E101°25′	570	2012/09	Jie Li；Xiu-Qin Ci；Meng-Meng Lu；Xiao-Cui Huang	Hsi-Wen Li	2012/10	HITBC J032
Lauraceae	Actinodaphne henryi	J066	China	Yunnan	Mengla	Menglun Xishuangbanna Tropical Botanical Garden	N21°41′	E101°25′	570	2012/09	Jie Li；Xiu-Qin Ci；Meng-Meng Lu；Xiao-Cui Huang	Hsi-Wen Li	2012/10	HITBC J066
Lauraceae	Machilus rufipes	J070	China	Yunnan	Mengla	Menglun Xishuangbanna Tropical Botanical Garden	N21°41′	E101°25′	570	2012/09	Jie Li；Xiu-Qin Ci；Meng-Meng Lu；Xiao-Cui Huang	Hsi-Wen Li	2012/10	HITBC J070
Lauraceae	Litsea acutivena	J083	China	Yunnan	Mengla	Menglun Xishuangbanna Tropical Botanical Garden	N21°41′	E101°25′	570	2012/09	Jie Li；Xiu-Qin Ci；Meng-Meng Lu；Xiao-Cui Huang	Hsi-Wen Li	2012/10	HITBC J083
Lauraceae	Beilschmiedia yunnanensis	J088	China	Yunnan	Mengla	Menglun Xishuangbanna Tropical Botanical Garden	N21°41′	E101°25′	570	2012/09	Jie Li；Xiu-Qin Ci；Meng-Meng Lu；Xiao-Cui Huang	Hsi-Wen Li	2012/10	HITBC J088
Lauraceae	Litsea acutivena	J092	China	Yunnan	Mengla	Menglun Xishuangbanna Tropical Botanical Garden	N21°41′	E101°25′	570	2012/09	Jie Li；Xiu-Qin Ci；Meng-Meng Lu；Xiao-Cui Huang	Hsi-Wen Li	2012/10	HITBC J092
Lauraceae	Cryptocarya acutifolia	J116	China	Yunnan	Mengla	Menglun Xishuangbanna Tropical Botanical Garden	N21°41′	E101°25′	570	2012/09	Jie Li；Xiu-Qin Ci；Meng-Meng Lu；Xiao-Cui Huang	Hsi-Wen Li	2012/10	HITBC J116
Lauraceae	Cryptocarya acutifolia	J127	China	Yunnan	Mengla	Menglun Xishuangbanna Tropical Botanical Garden	N21°41′	E101°25′	570	2012/09	Jie Li；Xiu-Qin Ci；Meng-Meng Lu；Xiao-Cui Huang	Hsi-Wen Li	2012/10	HITBC J127
Lauraceae	Litsea salicifolia	J130	China	Yunnan	Mengla	Menglun Xishuangbanna Tropical Botanical Garden	N21°41′	E101°25′	570	2012/09	Jie Li；Xiu-Qin Ci；Meng-Meng Lu；Xiao-Cui Huang	Hsi-Wen Li	2012/10	HITBC J130
Lauraceae	Litsea elongata var. subverticillata	J133	China	Yunnan	Mengla	Menglun Xishuangbanna Tropical Botanical Garden	N21°41′	E101°25′	570	2012/09	Jie Li；Xiu-Qin Ci；Meng-Meng Lu；Xiao-Cui Huang	Hsi-Wen Li	2012/10	HITBC J133
Lauraceae	Cryptocarya acutifolia	J135	China	Yunnan	Mengla	Menglun Xishuangbanna Tropical Botanical Garden	N21°41′	E101°25′	570	2012/09	Jie Li；Xiu-Qin Ci；Meng-Meng Lu；Xiao-Cui Huang	Hsi-Wen Li	2012/10	HITBC J135
Lauraceae	Litsea szemois	J162	China	Yunnan	Mengla	Menglun Xishuangbanna Tropical Botanical Garden	N21°41′	E101°25′	570	2012/09	Jie Li；Xiu-Qin Ci；Meng-Meng Lu；Xiao-Cui Huang	Hsi-Wen Li	2012/10	HITBC J162
Lauraceae	Beilschmiedia yunnanensis	J193	China	Yunnan	Mengla	Menglun Xishuangbanna Tropical Botanical Garden	N21°41′	E101°25′	570	2012/09	Jie Li；Xiu-Qin Ci；Meng-Meng Lu；Xiao-Cui Huang	Hsi-Wen Li	2012/10	HITBC J193
Lauraceae	Cryptocarya yunnanensis	J198	China	Yunnan	Mengla	Menglun Xishuangbanna Tropical Botanical Garden	N21°41′	E101°25′	570	2012/09	Jie Li；Xiu-Qin Ci；Meng-Meng Lu；Xiao-Cui Huang	Hsi-Wen Li	2012/10	HITBC J198
Lauraceae	Litsea liyuyingi	J199	China	Yunnan	Mengla	Menglun Xishuangbanna Tropical Botanical Garden	N21°41′	E101°25′	570	2012/09	Jie Li；Xiu-Qin Ci；Meng-Meng Lu；Xiao-Cui Huang	Hsi-Wen Li	2012/10	HITBC J199
Lauraceae	Litsea pierrei	J227	China	Yunnan	Mengla	Menglun Xishuangbanna Tropical Botanical Garden	N21°41′	E101°25′	570	2012/09	Jie Li；Xiu-Qin Ci；Meng-Meng Lu；Xiao-Cui Huang	Hsi-Wen Li	2012/10	HITBC J227
Lauraceae	Litsea szemois	J256	China	Yunnan	Mengla	Menglun Xishuangbanna Tropical Botanical Garden	N21°41′	E101°25′	570	2012/09	Jie Li；Xiu-Qin Ci；Meng-Meng Lu；Xiao-Cui Huang	Hsi-Wen Li	2012/10	HITBC J256
Lauraceae	Litsea szemois	J263	China	Yunnan	Mengla	Menglun Xishuangbanna Tropical Botanical Garden	N21°41′	E101°25′	570	2012/09	Jie Li；Xiu-Qin Ci；Meng-Meng Lu；Xiao-Cui Huang	Hsi-Wen Li	2012/10	HITBC J263
Lauraceae	Phoebe lanceolata	J274	China	Yunnan	Mengla	Menglun Xishuangbanna Tropical Botanical Garden	N21°41′	E101°25′	570	2012/09	Jie Li；Xiu-Qin Ci；Meng-Meng Lu；Xiao-Cui Huang	Hsi-Wen Li	2012/10	HITBC J274
Lauraceae	Litsea panamonja	J290	China	Yunnan	Mengla	Menglun Xishuangbanna Tropical Botanical Garden	N21°41′	E101°25′	570	2012/09	Jie Li；Xiu-Qin Ci；Meng-Meng Lu；Xiao-Cui Huang	Hsi-Wen Li	2012/10	HITBC J290
Lauraceae	Beilschmiedia percoriacea	J291	China	Yunnan	Mengla	Menglun Xishuangbanna Tropical Botanical Garden	N21°41′	E101°25′	570	2012/09	Jie Li；Xiu-Qin Ci；Meng-Meng Lu；Xiao-Cui Huang	Hsi-Wen Li	2012/10	HITBC J291
Lauraceae	Beilschmiedia brachythyrsa	J316	China	Yunnan	Mengla	Menglun Xishuangbanna Tropical Botanical Garden	N21°41′	E101°25′	570	2012/09	Jie Li；Xiu-Qin Ci；Meng-Meng Lu；Xiao-Cui Huang	Hsi-Wen Li	2012/10	HITBC J316
Lauraceae	Lindera metcalfiana	J330	China	Yunnan	Mengla	Menglun Xishuangbanna Tropical Botanical Garden	N21°41′	E101°25′	570	2012/09	Jie Li；Xiu-Qin Ci；Meng-Meng Lu；Xiao-Cui Huang	Hsi-Wen Li	2012/10	HITBC J330
Lauraceae	Cinnamomum contractum	J336	China	Yunnan	Mengla	Menglun Xishuangbanna Tropical Botanical Garden	N21°41′	E101°25′	570	2012/09	Jie Li；Xiu-Qin Ci；Meng-Meng Lu；Xiao-Cui Huang	Hsi-Wen Li	2012/10	HITBC J336
Lauraceae	Phoebe puwenensis	J337	China	Yunnan	Mengla	Menglun Xishuangbanna Tropical Botanical Garden	N21°41′	E101°25′	570	2012/09	Jie Li；Xiu-Qin Ci；Meng-Meng Lu；Xiao-Cui Huang	Hsi-Wen Li	2012/10	HITBC J337
Lauraceae	Litsea liyuyingi	J366	China	Yunnan	Mengla	Menglun Xishuangbanna Tropical Botanical Garden	N21°41′	E101°25′	570	2012/09	Jie Li；Xiu-Qin Ci；Meng-Meng Lu；Xiao-Cui Huang	Hsi-Wen Li	2012/10	HITBC J366
Lauraceae	Litsea liyuyingi	J371	China	Yunnan	Mengla	Menglun Xishuangbanna Tropical Botanical Garden	N21°41′	E101°25′	570	2012/09	Jie Li；Xiu-Qin Ci；Meng-Meng Lu；Xiao-Cui Huang	Hsi-Wen Li	2012/10	HITBC J371
Lauraceae	Beilschmiedia yunnanensis	J386	China	Yunnan	Mengla	Menglun Xishuangbanna Tropical Botanical Garden	N21°41′	E101°25′	570	2012/09	Jie Li；Xiu-Qin Ci；Meng-Meng Lu；Xiao-Cui Huang	Hsi-Wen Li	2012/10	HITBC J386
Lauraceae	Litsea verticillata	J388	China	Yunnan	Mengla	Menglun Xishuangbanna Tropical Botanical Garden	N21°41′	E101°25′	570	2012/09	Jie Li；Xiu-Qin Ci；Meng-Meng Lu；Xiao-Cui Huang	Hsi-Wen Li	2012/10	HITBC J388
Lauraceae	Cryptocarya yunnanensis	J400	China	Yunnan	Mengla	Menglun Xishuangbanna Tropical Botanical Garden	N21°41′	E101°25′	570	2012/09	Jie Li；Xiu-Qin Ci；Meng-Meng Lu；Xiao-Cui Huang	Hsi-Wen Li	2012/10	HITBC J400
Lauraceae	Machilus nanmu	J401	China	Yunnan	Mengla	Menglun Xishuangbanna Tropical Botanical Garden	N21°41′	E101°25′	570	2012/09	Jie Li；Xiu-Qin Ci；Meng-Meng Lu；Xiao-Cui Huang	Hsi-Wen Li	2012/10	HITBC J401
Lauraceae	Beilschmiedia robusta	J402	China	Yunnan	Mengla	Menglun Xishuangbanna Tropical Botanical Garden	N21°41′	E101°25′	570	2012/09	Jie Li；Xiu-Qin Ci；Meng-Meng Lu；Xiao-Cui Huang	Hsi-Wen Li	2012/10	HITBC J402
Lauraceae	Litsea lancilimba	J407	China	Yunnan	Mengla	Menglun Xishuangbanna Tropical Botanical Garden	N21°41′	E101°25′	570	2012/09	Jie Li；Xiu-Qin Ci；Meng-Meng Lu；Xiao-Cui Huang	Hsi-Wen Li	2012/10	HITBC J407
Lauraceae	Litsea lancifolia	J409	China	Yunnan	Mengla	Menglun Xishuangbanna Tropical Botanical Garden	N21°41′	E101°25′	570	2012/09	Jie Li；Xiu-Qin Ci；Meng-Meng Lu；Xiao-Cui Huang	Hsi-Wen Li	2012/10	HITBC J409
Lauraceae	Beilschmiedia percoriacea	J415	China	Yunnan	Mengla	Menglun Xishuangbanna Tropical Botanical Garden	N21°41′	E101°25′	570	2012/09	Jie Li；Xiu-Qin Ci；Meng-Meng Lu；Xiao-Cui Huang	Hsi-Wen Li	2012/10	HITBC J415
Lauraceae	Cinnamomum contractum	J443	China	Yunnan	Mengla	Menglun Xishuangbanna Tropical Botanical Garden	N21°41′	E101°25′	570	2012/09	Jie Li；Xiu-Qin Ci；Meng-Meng Lu；Xiao-Cui Huang	Hsi-Wen Li	2012/10	HITBC J443
Lauraceae	Beilschmiedia purpurascens	J467	China	Yunnan	Mengla	Menglun Xishuangbanna Tropical Botanical Garden	N21°41′	E101°25′	570	2012/09	Jie Li；Xiu-Qin Ci；Meng-Meng Lu；Xiao-Cui Huang	Hsi-Wen Li	2012/10	HITBC J467
Lauraceae	Cryptocarya acutifolia	J470	China	Yunnan	Mengla	Menglun Xishuangbanna Tropical Botanical Garden	N21°41′	E101°25′	570	2012/09	Jie Li；Xiu-Qin Ci；Meng-Meng Lu；Xiao-Cui Huang	Hsi-Wen Li	2012/10	HITBC J470
Lauraceae	Beilschmiedia yunnanensis	J485	China	Yunnan	Mengla	Menglun Xishuangbanna Tropical Botanical Garden	N21°41′	E101°25′	570	2012/09	Jie Li；Xiu-Qin Ci；Meng-Meng Lu；Xiao-Cui Huang	Hsi-Wen Li	2012/10	HITBC J485
Lauraceae	Cryptocarya acutifolia	J491	China	Yunnan	Mengla	Menglun Xishuangbanna Tropical Botanical Garden	N21°41′	E101°25′	570	2012/09	Jie Li；Xiu-Qin Ci；Meng-Meng Lu；Xiao-Cui Huang	Hsi-Wen Li	2012/10	HITBC J491
Lauraceae	Litsea elongata	J515	China	Yunnan	Mengla	Menglun Xishuangbanna Tropical Botanical Garden	N21°41′	E101°25′	570	2012/09	Jie Li；Xiu-Qin Ci；Meng-Meng Lu；Xiao-Cui Huang	Hsi-Wen Li	2012/10	HITBC J515
Lauraceae	Beilschmiedia purpurascens	J528	China	Yunnan	Mengla	Menglun Xishuangbanna Tropical Botanical Garden	N21°41′	E101°25′	570	2012/09	Jie Li；Xiu-Qin Ci；Meng-Meng Lu；Xiao-Cui Huang	Hsi-Wen Li	2012/10	HITBC J528
Lauraceae	Cryptocarya acutifolia	J537	China	Yunnan	Mengla	Menglun Xishuangbanna Tropical Botanical Garden	N21°41′	E101°25′	570	2012/09	Jie Li；Xiu-Qin Ci；Meng-Meng Lu；Xiao-Cui Huang	Hsi-Wen Li	2012/10	HITBC J537
Lauraceae	Cryptocarya acutifolia	J542	China	Yunnan	Mengla	Menglun Xishuangbanna Tropical Botanical Garden	N21°41′	E101°25′	570	2012/09	Jie Li；Xiu-Qin Ci；Meng-Meng Lu；Xiao-Cui Huang	Hsi-Wen Li	2012/10	HITBC J542
Lauraceae	Cinnamomum bejolghota	J559	China	Yunnan	Mengla	Menglun Xishuangbanna Tropical Botanical Garden	N21°41′	E101°25′	570	2012/09	Jie Li；Xiu-Qin Ci；Meng-Meng Lu；Xiao-Cui Huang	Hsi-Wen Li	2012/10	HITBC J559
Lauraceae	Lindera metcalfiana	J572	China	Yunnan	Mengla	Menglun Xishuangbanna Tropical Botanical Garden	N21°41′	E101°25′	570	2012/09	Jie Li；Xiu-Qin Ci；Meng-Meng Lu；Xiao-Cui Huang	Hsi-Wen Li	2012/10	HITBC J572
Lauraceae	Beilschmiedia brachythyrsa	J576	China	Yunnan	Mengla	Menglun Xishuangbanna Tropical Botanical Garden	N21°41′	E101°25′	570	2012/09	Jie Li；Xiu-Qin Ci；Meng-Meng Lu；Xiao-Cui Huang	Hsi-Wen Li	2012/10	HITBC J576
Lauraceae	Phoebe puwenensis	J589	China	Yunnan	Mengla	Menglun Xishuangbanna Tropical Botanical Garden	N21°41′	E101°25′	570	2012/09	Jie Li；Xiu-Qin Ci；Meng-Meng Lu；Xiao-Cui Huang	Hsi-Wen Li	2012/10	HITBC J589
Lauraceae	Cryptocarya densiflora	J600	China	Yunnan	Mengla	Menglun Xishuangbanna Tropical Botanical Garden	N21°41′	E101°25′	570	2012/09	Jie Li；Xiu-Qin Ci；Meng-Meng Lu；Xiao-Cui Huang	Hsi-Wen Li	2012/10	HITBC J600
Lauraceae	Cryptocarya acutifolia	J607	China	Yunnan	Mengla	Menglun Xishuangbanna Tropical Botanical Garden	N21°41′	E101°25′	570	2012/09	Jie Li；Xiu-Qin Ci；Meng-Meng Lu；Xiao-Cui Huang	Hsi-Wen Li	2012/10	HITBC J607
Lauraceae	Litsea mollis	J667	China	Yunnan	Mengla	Menglun Xishuangbanna Tropical Botanical Garden	N21°41′	E101°25′	570	2012/09	Jie Li；Xiu-Qin Ci；Meng-Meng Lu；Xiao-Cui Huang	Hsi-Wen Li	2012/10	HITBC J667
Lauraceae	Litsea elongata	J668	China	Yunnan	Mengla	Menglun Xishuangbanna Tropical Botanical Garden	N21°41′	E101°25′	570	2012/09	Jie Li；Xiu-Qin Ci；Meng-Meng Lu；Xiao-Cui Huang	Hsi-Wen Li	2012/10	HITBC J668
Lauraceae	Litsea szemois	J672	China	Yunnan	Mengla	Menglun Xishuangbanna Tropical Botanical Garden	N21°41′	E101°25′	570	2012/09	Jie Li；Xiu-Qin Ci；Meng-Meng Lu；Xiao-Cui Huang	Hsi-Wen Li	2012/10	HITBC J672
Lauraceae	Beilschmiedia roxburghiana	J677	China	Yunnan	Mengla	Menglun Xishuangbanna Tropical Botanical Garden	N21°41′	E101°25′	570	2012/09	Jie Li；Xiu-Qin Ci；Meng-Meng Lu；Xiao-Cui Huang	Hsi-Wen Li	2012/10	HITBC J677
Lauraceae	Beilschmiedia robusta	J711	China	Yunnan	Mengla	Menglun Xishuangbanna Tropical Botanical Garden	N21°41′	E101°25′	570	2012/09	Jie Li；Xiu-Qin Ci；Meng-Meng Lu；Xiao-Cui Huang	Hsi-Wen Li	2012/10	HITBC J711
Lauraceae	Lindera metcalfiana var. dictyophylla	J721	China	Yunnan	Mengla	Menglun Xishuangbanna Tropical Botanical Garden	N21°41′	E101°25′	570	2012/09	Jie Li；Xiu-Qin Ci；Meng-Meng Lu；Xiao-Cui Huang	Hsi-Wen Li	2012/10	HITBC J721
Lauraceae	Cryptocarya chinensis	J722	China	Yunnan	Mengla	Menglun Xishuangbanna Tropical Botanical Garden	N21°41′	E101°25′	570	2012/09	Jie Li；Xiu-Qin Ci；Meng-Meng Lu；Xiao-Cui Huang	Hsi-Wen Li	2012/10	HITBC J722
Lauraceae	Beilschmiedia brachythyrsa	L026	China	Yunnan	Mengla	Menglun Xishuangbanna Tropical Botanical Garden	N21°41′	E101°25′	570	2012/09	Jie Li；Xiu-Qin Ci；Meng-Meng Lu；Xiao-Cui Huang	Hsi-Wen Li	2012/10	HITBC L026
Lauraceae	Beilschmiedia pauciflora	L033	China	Yunnan	Mengla	Menglun Xishuangbanna Tropical Botanical Garden	N21°41′	E101°25′	570	2012/09	Jie Li；Xiu-Qin Ci；Meng-Meng Lu；Xiao-Cui Huang	Hsi-Wen Li	2012/10	HITBC L033
Lauraceae	Cryptocarya calcicola	L050	China	Yunnan	Mengla	Menglun Xishuangbanna Tropical Botanical Garden	N21°41′	E101°25′	570	2012/09	Jie Li；Xiu-Qin Ci；Meng-Meng Lu；Xiao-Cui Huang	Hsi-Wen Li	2012/10	HITBC L050
Lauraceae	Beilschmiedia purpurascens	L061	China	Yunnan	Mengla	Menglun Xishuangbanna Tropical Botanical Garden	N21°41′	E101°25′	570	2012/09	Jie Li；Xiu-Qin Ci；Meng-Meng Lu；Xiao-Cui Huang	Hsi-Wen Li	2012/10	HITBC L061
Lauraceae	Neolitsea homilantha	LJ0013	China	Yunnan	Panlong area	Kunming Botanical Garden	N25°8′35.8″	E102°44′29.64″	1800	2002-06-01	Hsi-Wen Li	Hsi-Wen Li	2002-06-01	HITBC LJ0013
Lauraceae	Cinnamomum longepaniculatum	LJ0014	China	Yunnan	Gongshan	Kunming Botanical Garden	N25°8'36"	E102°44′30″	1800	2002-06-01	Hsi-Wen Li	Hsi-Wen Li	2002-06-01	HITBC LJ0014
Lauraceae	Lindera thomsonii	LJ15201	China	Yunnan	Mengla	Dulongjiang Town Xianjiudang	N 27°5'21.6"	E 98°32′11.2″	1560	2002-07-23	Heng Li；Rong Li；Zhiling Dao	Hsi-Wen Li	2003-09-25	HITBC LJ15201
Lauraceae	Neolitsea levinei	LJ2002003	China	Yunnan	Mohan	Menglun Xishuangbanna Tropical Botanical Garden	N21°54′34.3″	E101°16′10.6″	560	2002-01-14	Jie Li	Hsi-Wen Li	2002-02-04	HITBC LJ2002003
Lauraceae	Machilus tenuipilis	LJ2002035	China	Yunnan	Mengla	China-Vietnam border	N21°11′5″	E101°41′12″	860	2002-01-19	Jie Li	Hsi-Wen Li	2002-02-04	HITBC LJ2002035
Lauraceae	Machilus tenuipilis	LJ2002038	China	Yunnan	Mengla	Menglun Xishuangbanna Tropical Botanical Garden	N21°54′34.3″	E101°16′10.6″	560	2002-01-21	Jie Li	Hsi-Wen Li	2002-02-04	HITBC LJ2002038
Lauraceae	Machilus salicina	LJ2002040	China	Yunnan	Tengchong	Menglun Xishuangbanna Tropical Botanical Garden	N21°54′34.3″	E101°16′10.6″	560	2002-01-22	Jie Li	Hsi-Wen Li	2002-02-04	HITBC LJ2002040
Lauraceae	Machilus shweliensis	LJ2002055	China	Yunnan	Tengchong	Rehai	N24°56′54"	E98°26′16″	1460	2002-02-17	Jie Li	Hsi-Wen Li	2003-07-17	HITBC LJ2002055
Lauraceae	Neolitsea homilantha	LJ2002058	China	Yunnan	Tengchong	Qushi town near Gaoligongshan Reserve	N25°13′23"	E98°36′30″	1500	2002-02-18	Jie Li	Hsi-Wen Li	2003-07-17	HITBC LJ2002058
Lauraceae	Neolitsea chuii	LJ2002063	China	Yunnan	Jingdong	Ailao Mountain Ecological Station	N24°32′5″	E101°1′45″	2200	2002-08-07	Jie Li	Hsi-Wen Li	2003-07-17	HITBC LJ2002063
Lauraceae	Cinnamomum chago	LJ2002064	China	Yunnan	Jingdong	Ailao Mountain Ecological Station	N24°32′5″	E101°1′45″	2200	2002-08-07	Jie Li	Hsi-Wen Li	2003-07-17	HITBC LJ2002064
Lauraceae	Machilus shweliensis	LJ2002065	China	Yunnan	Jingdong	Ailao Mountain Ecological Station	N24°32′5″	E101°1′45″	2200	2002-08-07	Jie Li	Hsi-Wen Li	2003-07-17	HITBC LJ2002065
Lauraceae	Neolitsea chuii	LJ2002068	China	Yunnan	Jingdong	Ailao Mountain Ecological Station	N24°32′6″	E101°1′46″	2201	2002-08-08	Jie Li	Hsi-Wen Li	2003-07-17	HITBC LJ2002068
Lauraceae	Neolitsea homilantha	LJ2002071	China	Yunnan	Jingdong	Ailao Mountain Ecological Station	N24°32′5″	E101°1′45″	2200	2002-08-07	Jie Li	Hsi-Wen Li	2003-07-17	HITBC LJ2002071
Lauraceae	Cinnamomum chago	LJ2002072	China	Yunnan	Jingdong	Ailao Mountain Ecological Station	N24°32′5″	E101°1′45″	2200	2002-08-07	Jie Li	Hsi-Wen Li	2003-07-17	HITBC LJ2002072
Lauraceae	Machilus gamblei	LJ2002084	China	Yunnan	Jingdong	Jinping town Wenbu village	N24°26′13.73″	E100°36′48″	1171	2002-08-09	Jie Li	Hsi-Wen Li	2003-07-13	HITBC LJ2002084
Lauraceae	Machilus shweliensis	LJ2002085	China	Yunnan	Jingdong	Jinping town Wenbu village	N24°26′14"	E100°36′49″	1171	2002-08-09	Jie Li	Hsi-Wen Li	2003-07-17	HITBC LJ2002085
Lauraceae	Machilus robusta	LJ2002086	China	Yunnan	Jingdong	Jinping town Wenbu village	N24°26′14"	E100°36′49″	1171	2002-08-09	Jie Li；Hsi-Wen Li；Junqiu Chen；Jinshun Zhong；	Hsi-Wen Li	2003-07-17	HITBC LJ2002086
Lauraceae	Machilus sichuanensis	LJ2002087	China	Yunnan	Jingdong	Jinping town Wenbu village	N24°26′14"	E100°36′49″	1171	2002-08-09	Jie Li	Hsi-Wen Li	2003-07-17	HITBC LJ2002087
Lauraceae	Machilus gamblei	LJ2002089	China	Yunnan	Jingdong	Jinping town Wenbu village	N24°26′14"	E100°36′49″	1171	2002-08-09	Jie Li	Hsi-Wen Li	2003-07-17	HITBC LJ2002089
Lauraceae	Neolitsea sutchuanensis	LJ2002101	China	Yunnan	Jingdong	Wuliang Mountain Nature Reserve Andingzhan	N24°43′12"	E100°34′38″	2400	2002-07-10	Jie Li	Hsi-Wen Li	2003-07-17	HITBC LJ2002101
Lauraceae	Neolitsea chuii	LJ2002102	China	Yunnan	Jingdong	Wuliang Mountain Nature Reserve Andingzhan	N24°43′12"	E100°34′38″	2400	2002-07-10	Jie Li	Hsi-Wen Li	2003-07-17	HITBC LJ2002102
Lauraceae	Machilus salicina	LJ2002103	China	Yunnan	Jingdong	Wuliang Mountain Nature Reserve Andingzhan	N24°43′12"	E100°34′38″	2400	2003-07-10	Jie Li	Hsi-Wen Li	2003-07-17	HITBC LJ2002103
Lauraceae	Machilus salicina	LJ2002105	China	Guangxi	Longzhou	Wuliang Mountain Nature Reserve Andingzhan	N24°43′12"	E100°34′38″	2400	2003-07-10	Jie Li	Hsi-Wen Li	2003-07-17	HITBC LJ2002105
Lauraceae	Machilus robusta	LJ2002116	China	Guangxi	Shangsi	Nonggang Nature Reserve	N22°28′40"	E106°55′55″	500	2003-09-13	Jie Li	Hsi-Wen Li	2003-10-15	HITBC LJ2002116
Lauraceae	Neolitsea pulchella	LJ2002141	China	Guangxi	Shangsi	Shiwandashan Forest Park	N21°49′52"	E107°55′40″	362	2003-09-15	Jie Li	Hsi-Wen Li	2003-10-15	HITBC LJ2002141
Lauraceae	Machilus gamblei	LJ2002143	China	Guangxi	Shangsi	Shiwandashan Forest Park	N21°49′52"	E107°55′40″	362	2003-09-15	Jie Li	Hsi-Wen Li	2003-10-15	HITBC LJ2002143
Lauraceae	Machilus robusta	LJ2002145	China	Guangxi	Shangsi	Shiwandashan Forest Park	N21°49′52"	E107°55′40″	362	2003-09-15	Jie Li	Hsi-Wen Li	2003-10-15	HITBC LJ2002145
Lauraceae	Neolitsea pulchella	LJ2002146	China	Guangxi	Shangsi	Shiwandashan Forest Park	N21°49′52"	E107°55′40″	362	2003-09-15	Jie Li	Hsi-Wen Li	2003-10-15	HITBC LJ2002145
Lauraceae	Machilus gamblei	LJ2002148	China	Guangxi	Shangsi	Shiwandashan Forest Park	N21°49′52"	E107°55′40″	362	2003-09-15	Jie Li	Hsi-Wen Li	2003-10-15	HITBC LJ2002148
Lauraceae	Machilus chienkweiensis	LJ2002153	China	Guangxi	Shangsi	Shiwandashan Pinglong Mountain	N21°46′55"	E107°55′30″	362	2003-09-16	Jie Li	Hsi-Wen Li	2003-10-15	HITBC LJ2002153
Lauraceae	Neolitsea chuii	LJ2002157	China	Guangxi	Shangsi	Shiwandashan Pinglong Mountain	N21°46′55"	E107°55′30″	362	2003-09-16	Jie Li	Hsi-Wen Li	2003-10-15	HITBC LJ2002157
Lauraceae	Neolitsea pulchella	LJ2002166	China	Guangxi	Shangsi	Shiwandashan Pinglong Mountain	N21°46′55"	E107°55′30″	362	2003-09-16	Jie Li	Hsi-Wen Li	2003-10-15	HITBC LJ2002166
Lauraceae	Machilus oreophila	LJ2002176	China	Guangxi	Jinxiu	Shiwandashan Pinglong Mountain	N21°46′55"	E107°55′30″	362	2003-09-16	Jie Li	Hsi-Wen Li	2003-10-15	HITBC LJ2002176
Lauraceae	Neolitsea levinei	LJ2002180	China	Guangxi	Jinxiu	Lianhua Mountain	N24°9′12"	E110°6′59″	1000	2003-09-18	Jie Li	Hsi-Wen Li	2003-10-15	HITBC LJ2002180
Lauraceae	Neolitsea aurata var. aurata	LJ2002181	China	Guangxi	Jinxiu	Lianhua Mountain	N24°9′12"	E110°6′59″	1000	2003-09-18	Jie Li	Hsi-Wen Li	2003-10-15	HITBC LJ2002181
Lauraceae	Neolitsea aurata var. aurata	LJ2002182	China	Guangxi	Jinxiu	Lianhua Mountain	N24°9′12"	E110°6′59″	1000	2003-09-18	Jie Li	Hsi-Wen Li	2003-10-15	HITBC LJ2002182
Lauraceae	Neolitsea pinninervis	LJ2002183	China	Guangxi	Jinxiu	Lianhua Mountain	N24°9′12"	E110°6′59″	1000	2003-09-18	Jie Li	Hsi-Wen Li	2003-10-15	HITBC LJ2002183
Lauraceae	Neolitsea pinninervis	LJ2002187	China	Guangxi	Jinxiu	Dayaoshan Nature Reserve Yinshan Protect area	N24°3′10"	E110°2′59″	1000	2003-09-18	Jie Li	Hsi-Wen Li	2003-10-15	HITBC LJ2002187
Lauraceae	Neolitsea chuii	LJ2002188	China	Guangxi	Jinxiu	Dayaoshan Nature Reserve Yinshan Protect area	N24°3′10"	E110°2′59″	1000	2003-09-18	Jie Li	Hsi-Wen Li	2003-10-15	HITBC LJ2002188
Lauraceae	Neolitsea chuii	LJ2002196	China	Guangxi	Jinxiu	Dayaoshan Nature Reserve Yinshan Protect area	N24°3′10"	E110°2′59″	1500	2003-09-19	Jie Li	Hsi-Wen Li	2003-10-15	HITBC LJ2002196
Lauraceae	Neolitsea pinninervis	LJ2002197	China	Guangxi	Jinxiu	Dayaoshan Nature Reserve Yinshan Protect area	N24°3′10"	E110°2′59″	1500	2003-09-19	Jie Li	Hsi-Wen Li	2003-10-15	HITBC LJ2002197
Lauraceae	Machilus oreophila	LJ2002211	China	Guangxi	Xingning	Medicinal botanical Garden	N22°51′1.8″	E108°22′29″	98	2003-09-22	Jie Li	Hsi-Wen Li	2003-10-15	HITBC LJ2002211
Lauraceae	Machilus oreophila	LJ2002212	China	Guangxi	Xingning	Medicinal botanical Garden	N22°51′1.8″	E108°22′29″	98	2003-09-22	Jie Li	Hsi-Wen Li	2003-10-15	HITBC LJ2002212
Lauraceae	Machilus oreophila	LJ2005012	China	Yunnan	Zhaoqing	Menglun Xishuangbanna Tropical Botanical Garden	N21°54′34.3″	E101°16′10.6″	560	2005-09-12	Junqiu Chen；Jinshun Zhong	Hsi-Wen Li	2005-09-26	HITBC LJ2005012
Lauraceae	Cinnamomum camphora	LJ2006004	China	Guangdong	Zhaoqing	Dinghu Mountain Nature Reserve Xikeng	N23°10'14"	E112°32′59"	330	2006-04-12	Jie Li；Hsi-Wen Li；Junqiu Chen；Jinshun Zhong	Hsi-Wen Li	2006-05-19	HITBC LJ2006004
Lauraceae	Neolitsea cambodiana var. cambodiana	LJ2006008	China	Guangdong	Zhaoqing	Dinghu Mountain Nature Reserve Xikeng	N23°10'14"	E112°32′59"	330	2006-04-12	Jie Li；Hsi-Wen Li；Junqiu Chen；Jinshun Zhong	Hsi-Wen Li	2006-05-19	HITBC LJ2006008
Lauraceae	Machilus breviflora	LJ2006013	China	Guangdong	Zhaoqing	Dinghu Mountain Nature Reserve Xikeng	N23°10'14"	E112°32′59"	330	2006-04-12	Jie Li；Hsi-Wen Li；Junqiu Chen；Jinshun Zhong	Hsi-Wen Li	2006-05-19	HITBC LJ2006013
Lauraceae	Machilus gamblei	LJ2006015	China	Guangdong	Zhaoqing	Dinghu Mountain Nature Reserve Xikeng	N23°10'14"	E112°32′59"	330	2006-04-12	Jie Li；Hsi-Wen Li；Junqiu Chen；Jinshun Zhong	Hsi-Wen Li	2006-05-18	HITBC LJ2006015
Lauraceae	Machilus kwangtungensis	LJ2006019	China	Guangdong	Zhaoqing	Dinghu Mountain Nature Reserve Xikeng	N23°10'14"	E112°32′59"	330	2006-04-12	Jie Li；Hsi-Wen Li；Junqiu Chen；Jinshun Zhong	Hsi-Wen Li	2006-05-19	HITBC LJ2006019
Lauraceae	Machilus kwangtungensis	LJ2006027	China	Guangdong	Zhaoqing	Dinghu Mountain Nature Reserve Xikeng	N23°10'14"	E112°32′59"	330	2006-04-12	Jie Li；Hsi-Wen Li；Junqiu Chen；Jinshun Zhong	Hsi-Wen Li	2006-05-19	HITBC LJ2006027
Lauraceae	Machilus grijsii	LJ2006028	China	Guangdong	Zhaoqing	Dinghu Mountain Nature Reserve Xikeng	N23°10'14"	E112°32′59"	330	2006-04-12	Jie Li；Hsi-Wen Li；Junqiu Chen；Jinshun Zhong	Hsi-Wen Li	2006-05-19	HITBC LJ2006028
Lauraceae	Machilus kwangtungensis	LJ2006032	China	Guangdong	Zhaoqing	Dinghu Mountain Nature Reserve Xikeng	N23°10'14"	E112°32′59"	330	2006-04-12	Jie Li；Hsi-Wen Li；Junqiu Chen；Jinshun Zhong	Hsi-Wen Li	2006-05-18	HITBC LJ2006032
Lauraceae	Machilus grijsii	LJ2006033	China	Guangdong	Zhaoqing	Dinghu Mountain Nature Reserve Xikeng	N23°10'14"	E112°32′59"	330	2006-04-12	Jie Li；Hsi-Wen Li；Junqiu Chen；Jinshun Zhong	Hsi-Wen Li	2006-05-19	HITBC LJ2006033
Lauraceae	Machilus salicina	LJ2006038	China	Guangdong	Fengkai	Heishiding Nature Reserve	N23°31'15"	E111°52′36"	800	2006-04-14	Jie Li；Hsi-Wen Li；Junqiu Chen；Jinshun Zhong	Hsi-Wen Li	2006-05-19	HITBC LJ2006038
Lauraceae	Machilus grijsii	LJ2006042	China	Guangdong	Fengkai	Heishiding Nature Reserve	N23°31'15"	E111°52′36"	800	2006-04-14	Jie Li；Hsi-Wen Li；Junqiu Chen；Jinshun Zhong	Hsi-Wen Li	2006-05-19	HITBC LJ2006042
Lauraceae	Machilus breviflora	LJ2006043	China	Guangdong	Fengkai	Heishiding Nature Reserve	N23°31'15"	E111°52′36"	800	2006-04-14	Jie Li；Hsi-Wen Li；Junqiu Chen；Jinshun Zhong	Hsi-Wen Li	2006-05-19	HITBC LJ2006043
Lauraceae	Machilus gamblei	LJ2006044	China	Guangdong	Fengkai	Heishiding Nature Reserve	N23°31'15"	E111°52′36"	800	2006-04-14	Jie Li；Hsi-Wen Li；Junqiu Chen；Jinshun Zhong	Hsi-Wen Li	2006-05-19	HITBC LJ2006044
Lauraceae	Machilus breviflora	LJ2006045	China	Guangdong	Fengkai	Heishiding Nature Reserve	N23°31'15"	E111°52′36"	800	2006-04-14	Jie Li；Hsi-Wen Li；Junqiu Chen；Jinshun Zhong	Hsi-Wen Li	2006-05-19	HITBC LJ2006045
Lauraceae	Neolitsea cambodiana var. cambodiana	LJ2006046	China	Guangdong	Fengkai	Heishiding Nature Reserve	N23°31'15"	E111°52′36"	800	2006-04-14	Jie Li；Hsi-Wen Li；Junqiu Chen；Jinshun Zhong	Hsi-Wen Li	2006-05-19	HITBC LJ2006046
Lauraceae	Neolitsea cambodiana var. cambodiana	LJ2006058	China	Guangdong	Fengkai	Heishiding Nature Reserve	N23°31'15"	E111°52′36"	800	2006-04-14	Jie Li；Hsi-Wen Li；Junqiu Chen；Jinshun Zhong	Hsi-Wen Li	2006-05-19	HITBC LJ2006058
Lauraceae	Machilus pomifera	LJ2006064	China	Guangdong	Fengkai	Heishiding Nature Reserve	N23°31'15"	E111°52′36"	800	2006-04-14	Jie Li；Hsi-Wen Li；Junqiu Chen；Jinshun Zhong	Hsi-Wen Li	2006-05-19	HITBC LJ2006064
Lauraceae	Machilus oreophila	LJ2006067	China	Guangdong	Tianhe	South China Botanical Garden	N23°11'12"	E113°21′57″	300	2006-04-16	Jie Li；Hsi-Wen Li；Junqiu Chen；Jinshun Zhong	Hsi-Wen Li	2006-05-19	HITBC LJ2006067
Lauraceae	Neolitsea phanerophlebia	LJ2006068	China	Guangdong	Tianhe	South China Botanical Garden	N23°11'12"	E113°21′57″	300	2006-04-16	Jie Li；Hsi-Wen Li；Junqiu Chen；Jinshun Zhong	Hsi-Wen Li	2006-05-19	HITBC LJ2006068
Lauraceae	Machilus platycarpa	LJ2006073	China	Guangdong	Tianhe	South China Botanical Garden	N23°11'12"	E113°21′57″	300	2006-04-16	Jie Li；Hsi-Wen Li；Junqiu Chen；Jinshun Zhong	Hsi-Wen Li	2006-05-19	HITBC LJ2006073
Lauraceae	Machilus pomifera	LJ2006079	China	Guangdong	Tianhe	South China Botanical Garden	N23°11'12"	E113°21′57″	300	2006-04-16	Jie Li；Hsi-Wen Li；Junqiu Chen；Jinshun Zhong	Hsi-Wen Li	2006-05-19	HITBC LJ2006079
Lauraceae	Machilus pomifera	LJ2006081	China	Guangdong	Tianhe	South China Botanical Garden	N23°11'12"	E113°21′57″	300	2006-04-16	Jie Li；Hsi-Wen Li；Junqiu Chen；Jinshun Zhong	Hsi-Wen Li	2006-05-19	HITBC LJ2006081
Lauraceae	Neolitsea chuii	LJ2006083	China	Guangdong	Tianhe	South China Botanical Garden	N23°11'12"	E113°21′57″	300	2006-04-16	Jie Li；Hsi-Wen Li；Junqiu Chen；Jinshun Zhong	Hsi-Wen Li	2006-05-19	HITBC LJ2006083
Lauraceae	Machilus platycarpa	LJ2006087	China	Guangdong	Tianhe	South China Botanical Garden	N23°11'12"	E113°21′57″	300	2006-04-16	Jie Li；Hsi-Wen Li；Junqiu Chen；Jinshun Zhong	Hsi-Wen Li	2006-05-19	HITBC LJ2006087
Lauraceae	Machilus chinensis	LJ2006090	China	Guangdong	Tianhe	South China Botanical Garden	N23°11'12"	E113°21′57″	300	2006-04-16	Jie Li；Hsi-Wen Li；Junqiu Chen；Jinshun Zhong	Hsi-Wen Li	2006-05-18	HITBC LJ2006090
Lauraceae	Machilus chinensis	LJ2006091	China	Guangdong	Tianhe	South China Botanical Garden	N23°11'12"	E113°21′57″	300	2006-04-16	Jie Li；Hsi-Wen Li；Junqiu Chen；Jinshun Zhong	Hsi-Wen Li	2006-05-18	HITBC LJ2006091
Lauraceae	Machilus duthiei	LJ2006094	China	Yunnan	Panlong area	Kunming Botanical Garden	N25°8′35.8″	E102°44′29.64″	1800	2006-07-13	Junqiu Chen	Hsi-Wen Li	2006-07-13	HITBC LJ2006094
Lauraceae	Machilus leptophylla	LJ2007190	China	Yunnan	Malipo	Jinchang Huoshaoliangzi	N23°10'30"	E104°50′00.65″	1506	2007-06-07	Lang Li	Hsi-Wen Li	2007-07-20	HITBC LJ2007190
Lauraceae	Neolitsea aurata var.chekiangensis	LJ2007197	China	Zhejiang	Linan	Xitianmu Mountain	N30°21'14"	E119°25′51″	1200	2007-06-08	Jie Li；Lang Li	Hsi-Wen Li	2007-07-20	HITBC LJ2007197
Lauraceae	Machilus grijsii	LJ2007211	China	Zhejiang	Linan	Xitianmu Mountain	N30°21'14"	E119°25′51″	1200	2007-06-08	Jie Li；Lang Li	Hsi-Wen Li	2007-07-20	HITBC LJ2007211
Lauraceae	Machilus salicina	LJ2007220	China	Zhejiang	Xihu	Hangzhou Botanical Garden	N30°15'12"	E120°7′42″	120	2007-06-09	Jie Li；Lang Li	Hsi-Wen Li	2007-07-20	HITBC LJ2007220
Lauraceae	Machilus leptophylla	LJ2007228	China	Zhejiang	Xihu	Hangzhou Botanical Garden	N30°15'12"	E120°7′42″	120	2007-06-09	Jie Li；Lang Li	Hsi-Wen Li	2007-07-20	HITBC LJ2007228
Lauraceae	Neolitsea aurata var. chekiangensis	LJ2007229	China	Zhejiang	Xihu	Hangzhou Botanical Garden	N30°15'12"	E120°7′42″	120	2007-06-09	Jie Li；Lang Li	Hsi-Wen Li	2007-07-20	HITBC LJ2007229
Lauraceae	Neolitsea sutchuanensis	LJ2007261	China	Sichuan	Emei	Emei Mountain	N29°40'42"	E103°24′12″	800	2007-06-18	Jie Li	Hsi-Wen Li	2007-07-20	HITBC LJ2007261
Lauraceae	Machilus nanmu	LJ2007263	China	Sichuan	Emei	Emei Mountain	N29°40'42"	E103°24′12″	800	2007-06-18	Lang Li	Hsi-Wen Li	2007-07-20	HITBC LJ2007263
Lauraceae	Machilus nanmu	LJ2007267	China	Sichuan	Emei	Emei Mountain	N29°40'42"	E103°24′12″	800	2007-06-18	Lang Li	Hsi-Wen Li	2007-07-20	HITBC LJ2007267
Lauraceae	Neolitsea confertifolia	LJ2007289	China	Sichuan	Emei	Emei Mountain	N29°40'42"	E103°24′12″	900	2007-06-19	Lang Li	Hsi-Wen Li	2007-07-20	HITBC LJ2007289
Lauraceae	Neolitsea confertifolia	LJ2007290	China	Sichuan	Emei	Emei Mountain	N29°40'42"	E103°24′12″	900	2007-06-19	Lang Li	Hsi-Wen Li	2007-07-20	HITBC LJ2007290
Lauraceae	Neolitsea confertifolia	LJ2007319	China	Hainan	Wuzhishan	Wuzhishan Nature Reserve	N18°50′31"	E109°35′40″	800	2007-11-10	Lang Li；Zhihua Wang	Hsi-Wen Li	2008-02-12	HITBC LJ2007319
Lauraceae	Neolitsea levinei	LJ2007363	China	Hainan	Ledong Li	Yinggeling Nature Reserve	N18°50′31"	E109°19′46″	1000	2007-11-13	Lang Li; Zhihua Wang	Hsi-Wen Li	2008-02-12	HITBC LJ2007363
Lauraceae	Neolitsea cambodiana var. cambodiana	LJ2007372	China	Hainan	Ledong Li	Yinggeling Nature Reserve	N18°50′31"	E109°19′46″	1000	2007-11-14	Lang Li; Zhihua Wang	Hsi-Wen Li	2008-02-12	HITBC LJ2007372
Lauraceae	Machilus chinensis	LJ2009004	China	Hainan	Changjiang Li county	Bawangling National Nature Reserve	N19°8′4″	E 109°15′45″	650	2009-09-17	Jie Li	Hsi-Wen Li	2009-09-21	HITBC LJ2009004
Lauraceae	Machilus salicina	LJ2009013	China	Hainan	Wuzhishan	Wuzhishan Nature Reserve	N18°50′06"	E109°33′45″	800	2009-09-19	Jie Li	Hsi-Wen Li	2009-09-21	HITBC LJ2009013
Lauraceae	Neolitsea levinei	LJ2009108	China	Yunnan	Xichou	Fadou Forest Management Station	N23°22′24.1″	E104°46′52.8″	1566	2009-11-13	Xiu-Qin Ci；Meng－Meng Lu；Pei-Rui Sun	Hsi-Wen Li	2010-03-11	HITBC LJ2009108
Lauraceae	Machilus duthiei	LJ603	China	Yunnan	Jinping	Fenshuiling Nature Reserve Radar Station	N22°51′	E103°13′	1923	2004-07-14	Min Deng	Hsi-Wen Li	2004-08-12	HITBC LJ603
Lauraceae	Litsea elongata	Q071	China	Yunnan	Zhenyuan	Jiujia town Qianjiazhai	N24°11'49.09"	E101°14′6.25″	1745	2012/05/10	Jie Li；Lang Li；Meng-Meng Lu	Hsi-Wen Li	2012/05/20	HITBC Q071
Lauraceae	Neolitsea chuii	Q079	China	Yunnan	Zhenyuan	Jiujia town Qianjiazhai	N24°11'49.09"	E101°14′6.25″	1745	2012/05/10	Jie Li；Lang Li；Meng-Meng Lu	Hsi-Wen Li	2012/05/20	HITBC Q079
Lauraceae	Neolitsea chuii	Q080	China	Yunnan	Zhenyuan	Jiujia town Qianjiazhai	N24°11'49.09"	E101°14′6.25″	1745	2012/05/10	Jie Li；Lang Li；Meng-Meng Lu	Hsi-Wen Li	2012/05/20	HITBC Q080
Lauraceae	Machilus rufipes	Q081	China	Yunnan	Zhenyuan	Jiujia town Qianjiazhai	N24°11'49.09"	E101°14′6.25″	1745	2012/05/10	Jie Li；Lang Li；Meng-Meng Lu	Hsi-Wen Li	2012/05/20	HITBC Q081
Lauraceae	Neolitsea homilantha	Q083	China	Yunnan	Zhenyuan	Jiujia town Qianjiazhai	N24°11'49.09"	E101°14′6.25″	1745	2012/05/10	Jie Li；Lang Li；Meng-Meng Lu	Hsi-Wen Li	2012/05/20	HITBC Q083
Lauraceae	Litsea honghoensis	Q085	China	Yunnan	Zhenyuan	Jiujia town Qianjiazhai	N24°11'49.09"	E101°14′6.25″	1745	2012/05/10	Jie Li；Lang Li；Meng-Meng Lu	Hsi-Wen Li	2012/05/20	HITBC Q085
Lauraceae	Cinnamomum chago	Q090	China	Yunnan	Zhenyuan	Jiujia town Qianjiazhai	N24°11'49.09"	E101°14′6.25″	1745	2012/05/10	Jie Li；Lang Li；Meng-Meng Lu	Hsi-Wen Li	2012/05/20	HITBC Q090
Lauraceae	Lindera thomsonii	Q096	China	Yunnan	Zhenyuan	Jiujia town Qianjiazhai	N24°11'49.09"	E101°14′6.25″	1745	2012/05/10	Jie Li；Lang Li；Meng-Meng Lu	Hsi-Wen Li	2012/05/20	HITBC Q096
Lauraceae	Machilus grijsii	Q109	China	Yunnan	Zhenyuan	Jiujia town Qianjiazhai	N24°11'49.09"	E101°14′6.25″	1745	2012/05/10	Jie Li；Lang Li；Meng-Meng Lu	Hsi-Wen Li	2012/05/20	HITBC Q109
Lauraceae	Machilus rufipes	Q110	China	Yunnan	Zhenyuan	Jiujia town Qianjiazhai	N24°11'49.09"	E101°14′6.25″	1745	2012/05/10	Jie Li；Lang Li；Meng-Meng Lu	Hsi-Wen Li	2012/05/20	HITBC Q110
Lauraceae	Machilus robusta	Q118	China	Yunnan	Zhenyuan	Jiujia town Qianjiazhai	N24°11'49.09"	E101°14′6.25″	1745	2012/05/10	Jie Li；Lang Li；Meng-Meng Lu	Hsi-Wen Li	2012/05/20	HITBC Q118
Lauraceae	Neolitsea homilantha	Q125	China	Yunnan	Zhenyuan	Jiujia town Qianjiazhai	N24°11'49.09"	E101°14′6.25″	1745	2012/05/10	Jie Li；Lang Li；Meng-Meng Lu	Hsi-Wen Li	2012/05/20	HITBC Q125
Lauraceae	Litsea elongata	Q126	China	Yunnan	Zhenyuan	Jiujia town Qianjiazhai	N24°11'49.09"	E101°14′6.25″	1745	2012/05/10	Jie Li；Lang Li；Meng-Meng Lu	Hsi-Wen Li	2012/05/20	HITBC Q126
Lauraceae	Actinodaphne trichocarpa	Q127	China	Yunnan	Zhenyuan	Jiujia town Qianjiazhai	N24°11'49.09"	E101°14′6.25″	1745	2012/05/10	Jie Li；Lang Li；Meng-Meng Lu	Hsi-Wen Li	2012/05/20	HITBC Q127
Lauraceae	Cinnamomum chago	Q129	China	Yunnan	Zhenyuan	Jiujia town Qianjiazhai	N24°11'49.09"	E101°14′6.25″	1745	2012/05/10	Jie Li；Lang Li；Meng-Meng Lu	Hsi-Wen Li	2012/05/20	HITBC Q129
Lauraceae	Lindera thomsonii	Q130	China	Yunnan	Zhenyuan	Jiujia town Qianjiazhai	N24°11'49.09"	E101°14′6.25″	1745	2012/05/10	Jie Li；Lang Li；Meng-Meng Lu	Hsi-Wen Li	2012/05/20	HITBC Q130
Lauraceae	Litsea honghoensis	Q131	China	Yunnan	Zhenyuan	Jiujia town Qianjiazhai	N24°11'49.09"	E101°14′6.25″	1745	2012/05/10	Jie Li；Lang Li；Meng-Meng Lu	Hsi-Wen Li	2012/05/20	HITBC Q131
Lauraceae	Litsea greenmaniana var. angustifolia	Q133	China	Yunnan	Zhenyuan	Jiujia town Qianjiazhai	N24°11'49.09"	E101°14′6.25″	1745	2012/05/10	Jie Li；Lang Li；Meng-Meng Lu	Hsi-Wen Li	2012/05/20	HITBC Q133
Lauraceae	Lindera latifolia	Q134	China	Yunnan	Zhenyuan	Jiujia town Qianjiazhai	N24°11'49.09"	E101°14′6.25″	1745	2012/05/10	Jie Li；Lang Li；Meng-Meng Lu	Hsi-Wen Li	2012/05/20	HITBC Q134
Lauraceae	Litsea yunnanensis	Q137	China	Yunnan	Zhenyuan	Jiujia town Qianjiazhai	N24°11'49.09"	E101°14′6.25″	1745	2012/05/10	Jie Li；Lang Li；Meng-Meng Lu	Hsi-Wen Li	2012/05/20	HITBC Q137
Lauraceae	Actinodaphne forrestii	Q141	China	Yunnan	Zhenyuan	Jiujia town Qianjiazhai	N24°11'49.09"	E101°14′6.25″	1745	2012/05/10	Jie Li；Lang Li；Meng-Meng Lu	Hsi-Wen Li	2012/05/20	HITBC Q141
Lauraceae	Phoebe rufescens	Q143	China	Yunnan	Zhenyuan	Jiujia town Qianjiazhai	N24°11'49.09"	E101°14′6.25″	1745	2012/05/10	Jie Li；Lang Li；Meng-Meng Lu	Hsi-Wen Li	2012/05/20	HITBC Q143
Lauraceae	Litsea elongata	Q147	China	Yunnan	Zhenyuan	Jiujia town Qianjiazhai	N24°11'49.09"	E101°14′6.25″	1745	2012/05/10	Jie Li；Lang Li；Meng-Meng Lu	Hsi-Wen Li	2012/05/20	HITBC Q147
